1 [Submitted to the journal *Papers in Palaeontology* in July 29, 2019]

2

3 SYSTEMATIC REVISION AND REDEFINITION OF THE GENUS *SCIRROTHERIUM*  
4 EDMUND & THEODOR, 1997 (CINGULATA, PAMPATHERIIDAE): IMPLICATIONS  
5 FOR THE ORIGIN OF PAMPATHERIIDS AND THE EVOLUTION OF THE SOUTH  
6 AMERICAN LINEAGE INCLUDING *HOLMESINA*

7

8 By KEVIN JIMÉNEZ-LARA<sup>1,2</sup>

9 <sup>1</sup>División de Paleontología de Vertebrados, Museo de La Plata, Facultad de Ciencias  
10 Naturales y Museo, Universidad Nacional de La Plata, Paseo del Bosque s/n, B1900FWA  
11 La Plata, Argentina.

12 <sup>2</sup>CONICET, Consejo Nacional de Investigaciones Científicas y Técnicas, Argentina.

13 e-mail: [kjimenezlara@fcnym.unlp.edu.ar](mailto:kjimenezlara@fcnym.unlp.edu.ar)

14

15 **Abstract:** The intrageneric relationships of the pampatheriid genus *Scirrotherium* and its  
16 affinities with supposedly related genera, i.e. *Kraglievichia* and *Holmesina*, are revised  
17 through parsimony phylogenetic analyses and new comparative morphological  
18 descriptions. For this work was analyzed unpublished material of pampatheriids (numerous  
19 osteoderms, one partial skull and a few postcranial bones) from Neogene formations of  
20 Colombia. The results show that *Scirrotherium* is paraphyletic if we include all its referred  
21 species, i.e. *Scirrotherium hondaensis*, *S. carinatum* and *S. antelucanus*. The species *S.*

22 *carinatum* is closer to *Kraglievichia paranensis* than to *S. hondaensis* or *S. antelucanus*,  
23 then it is proposed the new name *K. carinatum* comb. nov. The relationships between *S.*  
24 *hondaensis* and *S. antelucanus* could not be resolved, so these species should be designated  
25 in aphyly. In spite of failing to recover *S. hondaensis* and *S. antelucanus* as one single  
26 clade, here is preferred to maintain the generic name *Scirrotherium* in both species from  
27 diagnostic evidence. New emended diagnoses for *Scirrotherium*, *S. hondaensis* and  
28 *Kraglievichia* are provided. The genus *Holmesina* was found monophyletic and located as  
29 the sister clade of *Scirrotherium* + *Kraglievichia*. The evolutionary and biogeographical  
30 implications of the new phylogeny and taxonomical re-arrangements are discussed. It is  
31 claimed a possible geographical origin of the family Pamphathiidae and *Scirrotherium* in  
32 low latitudes of South America as early as Early Miocene (Burdigalian) times. The South  
33 American ancestor or sister taxon of *Holmesina* is predicted as morphologically more  
34 similar to *Scirrotherium* than to *Kraglievichia*.

35 **Key words:** Pamphathiidae, *Scirrotherium*, *Kraglievichia*, *Holmesina*, Great American  
36 Biotic Interchange, Neogene.

37

38 The pamphathiids (Pamphathiidae) are a morphologically conservative extinct clade of  
39 glyptodontoid cingulates or highly armored xenarthrans (Glyptodontoidea *sensu* McKenna &  
40 Bell 1997) with medium-to-large body sizes (Edmund 1985; Góis et al. 2013). They were  
41 distributed from the Neogene to the Early Holocene in numerous localities of South  
42 America (their native range), Central America, Mexico and the United States (Edmund  
43 1985; Vizcaíno et al. 1998; Rincón et al. 2014; Góis et al. 2015 and references there). As  
44 the modern armadillos (Dasypodidae), pamphathiids have a flexible carapace by the

45 presence of three transverse bands of imbricated osteoderms which conform a kind of  
46 “articulation” between the scapular and pelvic shields (Edmund 1985). The pampatheriids  
47 also have multiple features, especially in their skull and mandible, which, collectively,  
48 define them as the sister group of glyptodontids –Glyptodontidae (Gaudin 2004; Gaudin &  
49 Wible 2006; Billet et al. 2011; Delsuc et al. 2012), namely deep horizontal mandibular  
50 ramus, laterally-directed zygomatic root, transversely-wide glenoid fossa, rough pterygoids,  
51 among others (Gaudin & Wible, 2006).

52 The fossil record of Pampatheriidae is mainly represented by isolated specimens, of which  
53 most of them are osteoderms and, in lesser extent, skulls, mandibles and postcranial bones;  
54 fairly complete and articulated skeletons are uncommon (Edmund 1985; Góis 2013). Due  
55 the above, the systematics of this xenartran group has historically been based on  
56 osteodermal characters (Edmund 1985, 1987; Góis et al. 2013), as has been the case with  
57 other cingulate clades. Overall, nearly two tens of pampatheriid species and seven genera  
58 are known (Góis 2013). The latter conform two possible subfamilial lineages: (1) that  
59 including to the genera *Plaina* and *Pampatherium*; and (2) that comprising the genera  
60 *Scirrotherium*, *Kraglievichia* and *Holmesina* (Edmund 1985). However, it does not exist in  
61 the scientific literature a published phylogenetic analysis on the relationships between the  
62 different pampatheriid genera. Only Góis (2013) performed a phylogenetic analysis for  
63 these taxa, but his results have not been published. In Góis’s consensus tree, it was  
64 corroborated the hypothesis by Edmund (1985) on the two subfamilial lineages.

65 The genus *Scirrotherium* is the oldest known pampatheriid in the fossil record (Góis et al.  
66 2013; Rincón et al. 2014) and one of the four Miocene genera (the other ones are  
67 *Kraglievichia* Castellanos 1927; *Vassallia* Castellanos, 1927; and *Plaina* Castellanos,

68 1937). This taxon was originally described by Edmund & Theodor (1997) from  
69 craniomandibular, postcranial and osteodermal specimens collected in the Middle Miocene  
70 (Serravalian) sedimentary sequence of the La Venta area, southwestern Colombia. These  
71 authors interpreted that the only known species in that time and type species, *Scirrotherium*  
72 *hondaensis*, has plesiomorphic traits in its osteological morphology which are expected for  
73 its antiquity. Additionally, they highlighted morphological similarity of *S. hondaensis* with  
74 the species *Vassallia minuta* (Late Miocene of southern and central South America; De  
75 Iullis & Edmund 2002), more than with any other pampatheriid.

76 Later, Góis et al. (2013) described a second species for *Scirrotherium*, *S. carinatum*, from  
77 the Late Miocene (Tortonian) of northeastern and southern of Argentina-northwestern  
78 Brazil. In northeastern Argentina (Entre Ríos Province), *S. carinatum* shares basal  
79 stratigraphic levels (“Conglomerado Osífero”, literally ‘bone-bearing conglomerate’) in the  
80 Ituzaingó Formation with the middle-sized pampatheriid *Kraglievichia paranensis* (Góis et  
81 al. 2013; Scillato-Yané et al. 2013), a taxon different but not distantly related to  
82 *Scirrotherium* as previously indicated. The species *S. carinatum*, based exclusively on  
83 osteoderms of different regions of the armored carapace, has a body size comparable or  
84 slightly smaller than that of *S. hondaensis* (Góis et al. 2013).

85 The phylogenetic analysis conducted by Góis (2013) recovered in polytomy to *S. carinatum*  
86 and *S. hondaensis*, being one of these species or both of them the sister taxon/taxa of the  
87 clade *Kraglievichia* + *Holmesina* (except *H. floridanus*). It is notorious the non-basal  
88 position of the *Scirrotherium* species within the general topology of the cladogram despite  
89 they conform the oldest known genus. Instead, these species are closely placed to widely  
90 recognized terminal taxa, i.e. *Holmesina* spp. (Edmund 1985, 1987; Gaudin & Lyon 2017).

91 If this result is correct, it would indicate a significantly long ghost lineage at the base of the  
92 evolutionary tree of Pamphateriidae.

93 Góis found phylogenetic support for *Scirrotherium* through one single synapomorphy, i.e.  
94 presence of deep longitudinal depressions (LDs) in osteoderms. This is a distinctive feature  
95 of *S. carinatum* but, in contrast, the LDs in *S. hondaensis* are relatively shallow, rather than  
96 deep. Interestingly, this putative synapomorphy is actually shared by *K. paranensis*. Góis  
97 explained the insufficient phylogenetic resolution in his analysis for *Scirrotherium* using  
98 the argument of fragmentary character of the fossil specimens of *S. hondaensis*, although in  
99 the case of *S. carinatum*, unlike the Colombian species, the skull, mandible and any  
100 postcranial bone are unknown (Góis et al. 2013).

101 Almost simultaneously to Góis's works, Laurito and Valerio (2013) reported and studied  
102 new pamphateriid material from the Late Miocene (Tortonian to Messinian) of Costa Rica,  
103 which was assigned to a new species, *S. antelucanus*. This species, the largest referred to  
104 *Scirrotherium* so far (body size comparable or slightly smaller than that of *K. paranensis*;  
105 Laurito & Valerio 2013), is based on osteoderms and some postcranial bones (femoral  
106 fragments and metatarsals). The occurrence of *S. antelucanus* in the Late Miocene of  
107 southern Central America suggests the genus *Scirrotherium* take part earlier than any other  
108 pamphateriid (i.e. *Plaina*, *Pamphaterium*, *Holmesina*; Woodburne 2010) in the late  
109 Cenozoic biotic interchanges of the Americas with its invasion to tropical North America  
110 ("North America" is defined here as all the continental territories north of the ancient  
111 location of the main geographical barrier between the Americas during the early Neogene,  
112 i.e. the Central American Seaway in northwestern Colombia), before the definitive closing

113 of the Panama Land Bridge (PLB) ca. 3 mya (Schmidt 2007; Coates & Stallard 2013;  
114 O’dea et al. 2016; Jaramillo 2018).

115 Recently, in several contributions on fossil vertebrate assemblages from the Neogene of  
116 Venezuela and Peru has been reported the occurrence of isolated osteoderms referred to  
117 *Scirrotherium*. In basis to these discoveries, the geographical and chronological distribution  
118 of the genus has been expanded in such a way that this taxon is now known for the Early  
119 and Late Miocene (Burdigalian and Tortonian) of northwestern Venezuela (Rincón et al.  
120 2014; Carrillo-Briceño et al. 2018) and Late Miocene (Tortonian) of northeastern Peru  
121 (Antoine et al. 2016).

122 Assuming all the previous taxonomical assignments are correct, the latitudinal range of  
123 *Scirrotherium*, from southern Central America to Patagonia (southern Argentina), is the  
124 widest latitudinal range of a Miocene pampatheriid, only comparable with those of the Plio-  
125 Pleistocene forms *Pampatherium* and *Holmesina* (Scillato-Yané et al. 2005). This  
126 biogeographical inference provides support to the hypothesis that *Scirrotherium* inhabited  
127 varied environments within its latitudinal range, and, consequently, it probably had a  
128 relatively high ecological flexibility (Góis et al. 2013).

129 Despite the progress in the systematic and biogeographical research of *Scirrotherium*, it is  
130 necessary at present a new reevaluation of several fundamental hypotheses about this taxon,  
131 including its taxonomical definition, monophyly and evolutionary relationships with other  
132 pampatheriid genera. Using parsimony phylogenetic analyses and morphological  
133 comparative descriptions of new pampatheriid remains from the Neogene of Colombia, this  
134 contribution reevaluates the taxonomic status of *Scirrotherium* and its relationships with  
135 supposedly allied genera, i.e. *Kraglievichia* and *Holmesina*. Accordingly, I suggest a new

136 taxonomical and nomenclatural reorganization with emended diagnoses for *Scirrotherium*  
137 and, complementarily, for the genus *Kraglievichia*.

138 Finally, considering the systematic reanalysis, I depict a model of biogeographical  
139 evolution for the lineage *Scirrotherium-Kraglievichia-Holmesina*. From this model, I draw  
140 out new hypotheses on the geographical origin of Pampatheriidae and the late Cenozoic  
141 dispersal events of pampatheriids to/from North America, including a possible re-entry  
142 event to South America of the species *S. antelucanus*.

143

## 144 MATERIAL AND METHODS

### 145 Selection of OTUs

146 I studied 12 species of pampatheriids attributed to six different genera. These species, in  
147 alphabetic order, are: *Holmesina floridanus* Robertson, 1976; *H. major* Lund, 1842; *H.*  
148 *occidentalis* Hoffstetter, 1952; *H. paulacoutoi* Cartelle & Bohórquez, 1985; *H.*  
149 *septentrionalis* Leidy, 1889; *Kraglievichia paranensis* Ameghino, 1888; *Pampatherium*  
150 *humboldtii* Lund, 1839; *Plaina intermedia* Ameghino, 1888; *Scirrotherium antelucanus*  
151 Laurito & Valerio, 2013; *S. carinatum* Góis, Scillato-Yané, Carlini and Guilherme, 2013; *S.*  
152 *hondaensis* Edmund & Theodor, 1997; and *Vassallia minuta* Moreno & Mercerat, 1891. It  
153 was also included in this selection unidentified pampatheriid material (MUN STRI 16718  
154 and 38064; see the section *Institutional abbreviations*) from the Castilletes Formation in  
155 Colombia (see below), which is referred as “Castilletes specimens”.

156 Among the former nominal species, I follow to Góis (2013) in considering *Vassallia*  
157 *maxima* as a junior synonym of *Pl. intermedia*. The only one species of *Holmesina* not

158 included in this study was *H. rondoniensis* Góis, Scillato-Yané, Carlini & Ubilla, 2012.  
159 This decision is based on a preliminary phylogenetic analysis in which *H. rondoniensis* was  
160 identified as a “wildcard” taxon obscuring the phylogenetic resolution. It was also not  
161 included in this analysis the species *Tonniciustus mirus* Góis, González Ruiz, Scillato-Yané  
162 & Soibelzon, 2015, which is considered a potentially problematic and late diverging taxon  
163 without any apparent substantial interest with respect to the systematic issues here  
164 addressed.

165

#### 166 **Morphological description of the specimens**

167 The osteological morphology of the selected species was revised from direct observations  
168 on specimens previously studied in other works, as well as through published/unpublished  
169 descriptions (Simpson 1930, Castellanos 1937; Edmund 1985, 1987; Edmund & Theodor  
170 1997; Góis 2013; Góis et al. 2013; Laurito & Valerio 2013; Scillato-Yané et al. 2013; Góis  
171 et al. 2015; Gaudin & Lyon 2017). Naturally, according to the objectives of this research,  
172 during the revision of material I focused on the species *S. antelucanus*, *S. carinatum* and *S.*  
173 *hondaensis*, and, additionally, species of genera considered closely allied to *Scirrotherium*,  
174 i.e. *K. paranensis* and *Holmesina* spp. (particularly *H. floridanus*; Appendix S1 of the  
175 Supplementary Material).

176 On other hand, new undescribed cranial, postcranial and osteodermal specimens were also  
177 used to reexamine the morphological variability of *Scirrotherium*. This material comes  
178 from five Neogene geological units of Colombia (Fig. 1): (1) Castilletes Formation (Early  
179 to Middle Miocene, late Burdigalian-Langhian), Municipality of Uribe, Department of La



180 Guajira; (2) La Victoria Formation (late Middle Miocene, Serravalian), Municipality of  
181 Villavieja, Department of Huila; (3) Villavieja Formation (late Middle Miocene,  
182 Serravalian), Municipality of Villavieja, Department of Huila; (4) Sincelejo Formation  
183 (Late Miocene-Early Pliocene, Messinian-Zanclean), Municipality of Los Palmitos,  
184 Department of Sucre; (5) Ware Formation (Late Pliocene, Piacenzian), Municipality of  
185 Uribia, Department of La Guajira. For detailed lithological descriptions and  
186 chronostratigraphic inferences on these formations, the reader is referred to the following  
187 references: Moreno et al. 2015 for the Castilletes and Ware Formations; Guerrero 1997,  
188 Flynn et al. 1997 and Anderson et al. 2016 for the La Victoria and Villavieja formations;  
189 and Flinch 2003, Villarroel & Clavijo 2005, Bermúdez et al. 2009 and Alfaro & Holz 2014  
190 for the Sincelejo Formation. The new fossils are deposited at the Paleontological Collection  
191 of the Museo Mapuka de la Universidad del Norte, Barranquilla, Colombia, except those  
192 collected in the La Victoria and Villavieja Formations. The latter are housed at the Museo  
193 de Historia Natural La Tatacoa, La Victoria Town, Municipality of Villavieja, Department  
194 of Huila, Colombia.

195 Cranial measurements, all taken on the midline of the skull (dorsally or ventrally), follow  
196 Góis (2013). The anatomical terminology for osteoderms is based on the proposal of Góis  
197 et al. (2013). All the measurements were taken with a digital caliper with a precision of  
198 0.01 mm.

199

200 **Selection and codification of characters**

201 I exclusively selected cranial, dental and osteodermal characters given that the postcranial  
202 bones of most species of Pamphateriidae is poorly known (Góis 2013). This selection was  
203 based on personal observations and previous quantitative and qualitative analyses of the  
204 interspecific, intergeneric and familial morphological variability of pamphateriids (e.g.  
205 Edmund 1985, 1987; Góis 2013; Góis et al. 2013; Laurito & Valerio 2013). Overall, a  
206 matrix of 27 characters (Appendix S2 of the Supplementary Material) was built and  
207 managed on Mesquite version 2.75 (Maddison & Maddison 2010). In this character list, 20  
208 characters are parsimony-informative and 7 are parsimony-uninformative; 5 are  
209 osteodermal characters and 22 are cranial or dental. The parsimony-uninformative  
210 characters allow to define potential autapomorphies of the studied taxa.

211

## 212 **Cladistic analyses**

213 Parsimony analyses under schemes of equal weights and implied weights (characters  
214 reweighted *a posteriori*; see below) were performed in PAUP\* version 4.0a142 (Swofford  
215 2015). In both weighting schemes, the species *P. humboldtii*, *Pl. intermedia* and *V. minuta*  
216 were defined as outgroup. The monophyly of the outgroup and rooting of trees from it was  
217 constrained. The selection of the outgroup is based on the hypothesis about subfamilial  
218 relationships of Pamphateriidae by Edmund (1985). The characters were treated as  
219 unordered. The criterion for character optimization was DELTRAN (see Gaudin 2004 for  
220 justification of this configuration). The analyses consisted of heuristic searches with  
221 random addition sequences of 1000 replicas. For reordering of branches, it was selected the  
222 TBR algorithm. The topological results of most parsimonious trees were summarized  
223 through strict consensus trees.

224 The methodology of implied weights is intended to mitigate potential biases by limited  
225 number of characters (especially osteodermal characters, as consequence of the  
226 evolutionary trend in Pampatheriidae towards a simplification of the ornamentation in  
227 comparison with that in other cingulate clades, e.g. Glyptodontidae) and the effect of  
228 homoplastic characters (Goloboff et al. 2008; Goloboff 2014). Characters were reweighted  
229 using the rescaled consistency index (mean value) of the equally-weighted parsimony  
230 analysis (see Ausich et al. 2015 and references there for justification of the use of rescaled  
231 consistency index for implied-weights parsimony analyses). A default concavity value ( $k =$   
232 3) was selected (Goloboff et al. 2018). Three successive rounds of character reweighting  
233 were needed until identical set of strict consensus trees were found in two consecutive  
234 searches (Swofford & Bell 2017).

235 Node support for the strict consensus tree resulting from the equally-weighted analysis was  
236 evaluated from absolute Bremer support values, while the node stability for the strict  
237 consensus tree obtained from the implied weighting analysis was evaluated using a  
238 bootstrap resampling procedure. The software FigTree v1.4.3  
239 (<http://tree.bio.ed.ac.uk/software/figtree/>) was used as graphical viewer and editor of  
240 cladograms.

241

## 242 **Taxonomical and nomenclatural criteria**

243 I applied a taxonomical and nomenclatural criterion reasonably, but not strictly, constrained  
244 by the phylogeny. This implies looking for a natural classification (i.e. based on  
245 monophyletic groups) without ignoring possible limitations of the phylogenetic inference

246 related to the available information in the fossil record and major morphological gaps.  
247 Additionally, it was used open nomenclature to indicate taxonomical uncertainty when  
248 necessary, following general recommendations of Bengston (1988) and updated definitions  
249 by Sigovini et al. (2016) for the qualifiers of this semantic tool of taxonomy.

250

### 251 **Institutional abbreviations**

252 CFM, Museo Nacional de Costa Rica, Colección de fósiles de la sección de Geología, San  
253 José, Costa Rica; FMNH, Field Museum Natural History, Chicago, Illinois, USA; Museo  
254 Argentino de Ciencias Naturales “Bernardino Rivadavia”, Colección de Paleovertebrados,  
255 Ciudad Autónoma de Buenos Aires, Argentina; MLP, Museo de La Plata, La Plata,  
256 Argentina; MUN STRI, Museo Mapuka de la Universidad del Norte, Colección de  
257 paleontología, Barranquilla, Colombia; UCMP, University of California Museum of  
258 Paleontology, Berkeley, California, USA; UF, Florida Museum of Natural History,  
259 Gainesville, Florida, USA; VPPLT, Museo de Historia Natural La Tatacoa, Colección de  
260 paleontología, La Victoria Town, Huila, Colombia.

261

### 262 **Anatomical abbreviations**

263 AM, anterior margin; FL, frontal bone length; GFL, greatest femoral length; GSL, greatest  
264 skull length; LCE, longitudinal central elevation; LD, longitudinal depression; LM, lateral  
265 margin; LUR, length of the upper teeth row; ME, marginal elevation; Mf, upper  
266 molariform; mf, lower molariform; NL, nasal bone length; PAL, parietal bone length; PL,

267 hard palate length; TTW, maximum width at the third trochanter of the femur; DW,  
268 maximum width of the femoral distal epiphysis.

269

## 270 **RESULTS**

### 271 **Cladistic analyses**

272 The parsimony analysis with equal weights obtained 107 most parsimonious trees (MPTs),  
273 each one of these with a tree length of 44 steps (consistency index = 0.909; retention index  
274 = 0.907; rescaled consistency index = 0.825). The strict consensus tree from these MPTs  
275 (Fig. 2A; tree length = 52; consistency index = 0.769; retention index = 0.721; rescaled  
276 consistency index = 0.555) is not fully resolved because it has two polytomies. One of these  
277 polytomies involves the species *S. hondaensis*, *S. antelucanus* and *H. floridanus*, while the  
278 other one is formed by *H. septentrionalis*, *H. major*, *H. paulacoutoi* and *H. occidentalis*.  
279 Three clades were recovered (excluding that of the entire ingroup): (1) All the ingroup taxa  
280 except “Castilletes specimens”; (2) *S. carinatum* + *K. paranensis*; and (3) *Holmesina* spp.  
281 except *H. floridanus*. On other hand, the parsimony analysis with implied weights yielded  
282 30 most parsimonious trees (MPTs), each one of those with a tree length of 109 weighted  
283 steps (consistency index = 0.982; retention index = 0.982; rescaled consistency index =  
284 0.964). The strict consensus tree from the MPTs (Fig. 2B; tree length = 91; consistency  
285 index = 0.978; retention index = 0.980; rescaled consistency index = 0.959), like that  
286 produced by the equally weighted approach, is not fully resolved. Again, two polytomies,  
287 but in this case the polytomy including *S. hondaensis*, *S. antelucanus* and *H. floridanus* was  
288 altered. The latter taxon is placed as the basal-most *Holmesina* species. The polytomy

289 formed by *H. septentrionalis*, *H. major*, *H. paulacoutoi* and *H. occidentalis* was  
290 unmodified. As consequence of the relocation of *H. floridanus* within the topology, four  
291 clades were recovered: (1) All the ingroup taxa except “Castilletes specimens”; (2) *S.*  
292 *carinatum* + *K. paranensis*; (3) *Holmesina* spp.; and (4) *H. septentrionalis*, *H. major* + *H.*  
293 *paulacoutoi* + *H. occidentalis*. According to the two schemes of weighting for the  
294 parsimony analyses, the genus *Scirrotherium* is paraphyletic if it is composed by *S.*  
295 *antelucanus*, *S. hondaensis* and *S. carinatum*. *S. carinatum* is closer to *K. paranensis* than  
296 to *S. hondaensis* or *S. antelucanus*. The relationships among *S. hondaensis* and *S.*  
297 *antelucanus* is not resolved in either of the two strict consensus trees.

298 In the strict consensus tree from the equally-weighted analysis there is moderate node  
299 support for the clade *S. carinatum* + *K. paranensis* (Bremer support value = 3). The clades  
300 (1) *Scirrotherium* spp. + *K. paranensis* + *Holmesina* spp.; and (2) *Holmesina* spp. are  
301 weakly supported (Bremer support values equal to 1 in both clades). The node stability  
302 analysis under implied weights (Fig. 2C) shows high resampling frequencies for the clades  
303 (1) *Scirrotherium* spp. + *K. paranensis* + *Holmesina* spp. (bootstrap value = 100); (2) *S.*  
304 *carinatum* + *K. paranensis* (bootstrap value = 100); (3) *Holmesina* spp. (bootstrap value =  
305 99); and (4) *H. septentrionalis* + *H. major* + *H. paulacoutoi* + *H. occidentalis* (bootstrap  
306 value = 100). Low resampling frequencies are related to the clades (1) *Scirrotherium* spp. +  
307 *K. paranensis* (bootstrap value = 59); and (2) *S. hondaensis* + *S. carinatum* + *K. paranensis*  
308 (bootstrap value = 60).

309

310 **SYSTEMATIC PALAEOLOGY**

311 XENARTHRA Cope, 1889

312 CINGULATA Illiger, 1811

313 GLYPTODONTOIDEA Gray, 1869

314 Family PAMPATHERIIDAE Paula Couto, 1954

315 Genus *Scirrotherium* Edmund & Theodor, 1997

316 *LSID*. urn:lsid:zoobank.org:act:313358B5-3B1F-4902-8C2E-BB07CFCBEE18

317 *Type species*: *Scirrotherium hondaensis* Edmund & Theodor, 1997 by original designation.

318 *Included species*: In addition to the type species, *S. antelucanus* Laurito & Valerio 2013.

319 *Emended diagnosis*: A pampatheriid of small-to-middle body size that can be distinguished  
320 from other pampatheriids by the following combination of features: thin non-marginal fixed  
321 osteoderms (~3.5–7 mm in thickness); slightly to moderately rough external surface of  
322 osteoderms; external surface of osteoderms with a sharp and uniformly narrow LCE; LCE  
323 from superficial to well-elevated; superficial to shallow LDs with gently slope towards the  
324 MEs; frequently one single, transversely elongated row of large foramina in the AM of  
325 fixed osteoderms; between 6 and 11 anterior foramina as maximum number of foramina per  
326 row.

327 *Discussion*: The taxonomical status of *Scirrotherium* is saved from invalidity by paraphyly  
328 by exclusion of the species '*S.* *carinatum* from the genus (see below). However, according  
329 to the preferred phylogenetic hypothesis presented here, i.e. the strict consensus tree from  
330 the parsimony analysis under implied weights (Fig. 2B), the other two referred species of  
331 *Scirrotherium* (*S. antelucanus* and *S. hondaensis*) should be designated in aphyly because

332 they do not have resolved relationships between them (see Ebach & Williams 2010 for  
333 details about the phylogenetic concept of aphyly). Until new evidence available,  
334 maintenance of the taxonomical validity of *Scirrotherium*, as defined here, is based on the  
335 emended diagnosis of this taxon, which is partially built from ambiguous synapomorphies,  
336 as well as from qualitative and quantitative morphological differences with other generic  
337 taxa.

338 *Stratigraphic and geographical distribution:* [Tentatively, by badly preserved material]  
339 Castillo Formation, upper Lower Miocene, upper Burdigalian, Lara State, Venezuela  
340 (Rincón et al. 2014); Castilletes Formation, upper Lower to lower Middle Miocene, upper  
341 Burdigalian to Langhian; Department of La Guajira, Colombia; La Victoria Formation and  
342 Villavieja Formation, upper Middle Miocene, Serravalian, Department of Huila, Colombia  
343 (Edmund & Theodor 1997); Caujarao Formation, lower Upper Miocene, Tortonian, Falcon  
344 State, Venezuela (Carrillo-Briceño et al. 2018); Curré Formation, Upper Miocene,  
345 Puntarenas Province, Costa Rica (Laurito & Valerio 2013); Sincelejo Formation, Upper  
346 Miocene to Lower Pliocene, Messinian-Zanclean, Department of Sucre, Colombia; Ware  
347 Formation, Upper Pliocene, Piacenzian, Department of La Guajira, Colombia.

348

349 *Scirrotherium hondaensis* Edmund & Theodor, 1997

350 *LSID.* urn:lsid:zoobank.org:act:E3B83181-91D6-44C8-90C0-BBAACEC2CDEE

351 *Holotype:* UCMP 40201, incomplete skull and left hemimandible.

352 *Type locality and horizon:* Municipality of Villavieja, Department of Huila, Colombia. La  
353 Victoria Formation, upper Middle Miocene, Serravalian.



354 *Referred material:* VPPLT 004, several fixed osteoderms; VPPLT 264, several fixed  
355 osteoderms and one semi-mobile osteoderm; VPPLT 348, tens of fixed and (semi) mobile  
356 osteoderms; VPPLT 701, several fixed osteoderms; VPPLT 706, one anterior skull, one  
357 femoral diaphysis, one ulna without distal epiphysis, several vertebrae and numerous fixed  
358 and (semi) mobile osteoderms; VPPLT 1683 - MT 18, several fixed and (semi) mobile  
359 osteoderms; UCMP 39846, one proximal femoral epiphysis, one left calcaneum and one  
360 left astragalus. All the osteoderms referred to *S. hondaensis* are illustrated in the Fig. 3.  
361 Other important specimens are illustrated in the Figs. 4–7.

362 *Stratigraphic and geographical provenance:* The samples VPPLT 004, 264, 701, 706 and  
363 (partially) 1683 - MT 18 were collected in the La Victoria Formation, upper Middle  
364 Miocene (Serravalian; see the Figs. 3–6 for more details on the stratigraphic provenance of  
365 individual specimens), while the sample UCMP 39846 and part of VPPLT 1683 - MT18  
366 comes from the Villavieja Formation, upper Middle Miocene (Serravalian).

367 *Emended differential diagnosis:* Pampatheriid of small body size that differs from other  
368 pampatheriids on this unique combination of characters: external surface of osteoderms  
369 with ornamentation (especially the LCE and MEs), in general terms, more protuberant than  
370 in *S. antelucanus*, but less than in *Kraglievichia*; size range of fixed osteoderms smaller  
371 than in *S. antelucanus* and similar to that in *Kraglievichia carinatum* comb. nov. (= '*S.*'  
372 *carinatum*; Góis et al. 2013; see below); fixed osteoderms generally thicker than in *K.*  
373 *carinatum* comb. nov. but less than in *K. paranensis*, similar to *S. antelucanus*; anterior  
374 foramina smaller than in *S. antelucanus*; anterior foramina in fixed osteoderms usually  
375 aligned in one individual row, although infrequently these osteoderms show an extra, short  
376 or reduced row of anterior foramina; two rows of anterior foramina in mobile osteoderms,

377 similar to *Vassallia* (Góis 2013); last lower molariform (mf9) incipiently bilobed; frontals  
378 prominently convex in lateral view, with this convexity in a posterior position to the  
379 insertion of the anterior root of the zygomatic arch; anterior root of the zygomatic arch  
380 posterolaterally projected with respect to the main body of maxilla.

381

### 382 *Comparative description*

383 For the original and detailed description of this species, including its osteoderms, see  
384 Edmund & Theodor (1997). See the Tables 1 and 2 for an updated compilation of  
385 osteodermal measurements of referred *Scirrotherium* species and comparisons with those of  
386 related taxa. Below there are descriptions of osteological structures and traits incompletely  
387 known or unknown for *S. hondaensis* so far.

388 *Skull*: The holotype of *S. hondaensis* UCMP 40201 includes a very fragmentary skull. This  
389 specimen does not preserve the anterior end of the rostrum, the most of the bone  
390 architecture at the orbit level (both dorsally and ventrally), part of the upper dental series,  
391 ear region, braincase nor occipital region. Comparatively, the skull of the sample VPPLT  
392 706 (Fig. 4), here originally described, is more complete, despite it also has some missing  
393 structures. This new, small skull (see Table 3 for morphometric comparisons) is relatively  
394 well preserved from the orbit level to the most anterior end of rostrum, except for the  
395 anterior zygomatic arch and nasals dorsally. It also has a less deformed rostrum than that of  
396 the holotypic skull of this species. The general aspect of the new skull is similar to those of  
397 all known skulls of Pampatheriidae. In lateral view, this is markedly depressed towards its  
398 anterior end. In dorsal view, it is tapered also towards its anterior rostrum, where it ends

399 abruptly. Proportionally, the rostrum is shorter than in *K. paranensis* and even more than in  
400 *H. floridanus*. In lateral view, the facial process of premaxilla is less defined than in *H.*  
401 *floridanus* and the premaxilla-maxilla suture has a convex form, like the former species  
402 (Gaudin & Lyon, 2017). The anterorbital fossa is arranged more vertically than in *K.*  
403 *paranensis* and *H. floridanus*. The lacrimal is, proportionally, the largest among  
404 pampatheriids. This bone severely restricts the frontomaxillary contact in lateral view,  
405 similarly to *K. paranensis*. The dorsal contribution of the lacrimal to the orbit is,  
406 proportionally, greater than in *H. floridanus* and similar to that in *K. paranensis*. The  
407 lacrimal foramen is anteriorly located and close to the anterior border of the orbit. The  
408 anterior root of zygomatic arch is projected posterolaterally, unlike other pampatheriids  
409 whose skull is known (lateral projection). The frontals show a conspicuous convexity in a  
410 posterior position to the insertion of the anterior root of zygomatic arch, in such a way that  
411 the posterior section of frontals is placed in a very different plane with respect to that of the  
412 anterior section of the same bones. Dorsally, the frontals are more anteroposteriorly  
413 elongated and more laterally expanded than in *K. paranensis*, similar to *Holmesina* spp.  
414 Ventrally, the hard palate has a wide aspect since the rostrum is shortened in comparison  
415 with other pampatheriids. Only two anterior molariforms are preserved (one Mf1 and one  
416 Mf2 in different rows) and inferences about upper dentition are made from the alveoli. The  
417 upper dental series, as in all the members of the family, is composed by nine molariforms.  
418 Of these teeth, the last five (Mf5-Mf9) are bilobed. The anterior molariforms (Mf1-Mf4)  
419 converge anteriorly between them, but they do not imbricate. The former teeth are rounded  
420 to elliptical, similarly to the condition observed in *H. floridanus*. They also are less  
421 mesiodistally elongated than in *K. paranensis*. The molariforms with greatest occlusion  
422 area are the fifth and sixth (Mf5 and Mf6). The area of occlusion of the upper molariforms

423 decrease distally from the fifth and sixth molariforms to the ninth, as in all the  
424 pampatheriids. The last upper molariform (Mf9) is the smallest of lobed molariforms and  
425 has the lesser degree of lobulation (elliptical shape for the material described by Edmund &  
426 Theodor 1997). In ventral view, the specimen VPPLT 706 is characterized by a gradual  
427 lateral widening of the maxilla from the level of the anterior border of the fifth upper  
428 molariform (Mf5). It is preserved the anterior section of palatines as far as a level slightly  
429 posterior to the last molariform (Mf9). The maxilla-palatine suture is not recognizable.

430 *Femur*: This bone in *S. hondaensis* was unknown so far, despite the existence of a pair of  
431 epiphyses (proximal and distal) from a left femur at the UCMP collections (UCMP 39846).  
432 Within the sample VPPLT 706 there is a left femur (Fig. 5A–D) without epiphyses  
433 (apparently it is not the same bone from which come the previously referred epiphyses).  
434 Thus, the complementary description of all these anatomical elements allows to reconstruct  
435 the overall femoral appearance and features. The estimated proximo-distal length of this  
436 appendicular bone is ca. 162 mm and its transverse width at third trochanter is 27.6 mm.  
437 These morphometric values are the smallest ones for known femora of Pampatheriidae  
438 (Table 4). They are only comparable to those of the specimen MLP 69-IX-8-13A which  
439 was referred to *K. cf. paranensis* (Góis 2013; Scillato-Yané et al. 2013). The femoral head  
440 is hemispheric and the greater trochanter is less high than in *K. cf. paranensis*, similar to  
441 the condition observed in *H. floridanus*. However, the greater trochanter has a more tapered  
442 proximal end than in the latter species. In *S. hondaensis*, the lesser trochanter is less  
443 mediolaterally expanded than in *K. cf. paranensis*. The femoral diaphysis is less curved  
444 than in *K. cf. paranensis*, similar to that in *H. floridanus*. The border located laterally and  
445 distally with respect to the third trochanter is more curved than in *H. floridanus*, similar to

446 that of *K. cf. paranensis*. The third trochanter is, proportionally, larger than in *K. cf.*  
447 *paranensis*, but less than in *H. floridanus*. The former bone projection is poorly tapered in  
448 comparison with the same structure in *P. humboldtii*. The patellar facets are less defined or  
449 delimited than in *K. cf. paranensis*. In *S. hondaensis* these facets are oriented toward the  
450 center of the anterior surface of the distal epiphysis, rather than laterally like in *K. cf.*  
451 *paranensis* and *H. floridanus*.

452 *Ulna*: This bone is also described here for the first time. In this case, a right ulna (Fig. 5E–  
453 H) without part of the diaphysis and the distal epiphysis. The (incomplete) proximo-distal  
454 length is 89.5 mm. The olecranon is elongated and protuberant. In internal view, it is less  
455 proximally tapered than in *H. floridanus*. The lateral entrance to the trochlear notch is more  
456 restricted than in *Pamphaterium*, similarly to *Holmesina*. Likewise, it is less proximo-  
457 distally elongated than in *H. floridanus*, more similar to that in *H. paulacoutoi*. Proximally,  
458 at the level of the trochlear notch, the posterior border is uniformly convex, not slightly  
459 concave, like in *H. floridanus*. The depression for the insertion of the anconeus muscle is  
460 deep and more proximally located than in *Pamphaterium*, similar to *Holmesina*.

461 *Vertebrae*: Some vertebrae are also reported (Fig. 6). One of these is a thoracic vertebra and  
462 five are caudal vertebrae, which four are articulated in two pairs and one is an isolated  
463 distal caudal vertebra. The body of the thoracic vertebra is anteriorly eroded, as well as the  
464 anterior zygapophyses. Posteriorly, the vertebral body has an outline similar to that of other  
465 pamphateriids. The vertebral body is proportionally higher than in *Tonnacintus mirus*.  
466 Notably, two ventrolateral apophyses are projected from the vertebral body, like some  
467 thoracic vertebrae in *T. mirus* (Góis et al. 2015). Although fragmented, the neural spine of  
468 the same vertebra is inferred as proportionally shorter than in *H. floridanus* and *T. mirus*.

469 On other hand, the anterior caudal vertebrae have a posteriorly oriented and tall neural  
470 spine. The transverse processes are relatively little extended to the sides.

471 *Astragalus*: In Edmund & Theodor (1997) was mentioned the existence of numerous  
472 undetermined postcranial elements whose description was postponed to include it in other  
473 publication. However, that description was never published. This postcranial material  
474 comprises, within the specimens recovered from the UCMP collections, a left astragalus  
475 (UCMP 39846; Fig. 7A–D). In dorsal view, it is observed a lateral trochlea considerably  
476 larger than the medial trochlea. The astragalar head is bulging, spherical, almost uniformly  
477 convex. There is a shallow concavity in the dorsal margin of the astragalar head whose  
478 function has been not determined, but it could be for tendinous insertion and attachment.

479 The astragalar neck is well-differentiated, similar to *Holmesina* and in contrast with that  
480 observed in *Pampatherium*. In ventral view, the facets of articulation with the calcaneum,  
481 i.e. ectal and sustentacular, are widely separated between them as one would be expect  
482 from the observations on their counterparts in the calcaneum (Edmund 1987). According to  
483 this, the ectal facet is noticeably larger than the sustentacular facet, unlike *H. floridanus*.

484 The ectal facet is kidney-shaped and the sustentacular facet has a sub-oval shape. Both of  
485 them are concave, especially the ectal facet which is very deep. The sustentacular facet is  
486 located in a central position within the astragalar neck.

487 *Calcaneum*: This foot bone is other postcranial element not described by Edmund and  
488 Theodor for *S. hondaensis*. A well-preserved left calcaneum is associated with the catalog  
489 number UCMP 39846 (Fig. 7E–F). This specimen has a proximo-distal length of 54.12 mm  
490 and a width at the level of facets (ectal and sustentacular) of ~10.2 mm. These values are  
491 the smallest for calcanei referred to Pampatheriidae. The only one species whose known

492 calcaneum is comparable in size to that of *S. hondaensis* is *H. floridanus*. The calcaneum of  
493 the latter species is slightly more proximo-distally elongated than in *S. hondaensis*, but it is  
494 around twice wider at the level of the ectal and sustentacular facets. This means that the  
495 calcaneum of *H. floridanus* is more robust than that of *S. hondaensis*. The calcaneal head is  
496 anteroposteriorly elongated, like in *H. floridanus* and unlike the proportionally short  
497 calcaneal head of *H. septentrionalis*. The anterior end of the calcaneal head is less truncated  
498 that in *Holmesina*. The calcaneum of *S. hondaensis* shows there is no contact between the  
499 borders of the ectal and sustentacular facets, similar to species of *Holmesina* other than *H.*  
500 *floridanus* and *Pamphaterium* (Góis 2013). These facets are slightly convex and they are  
501 separated by a moderately deep and very wide groove, i.e. the *sulcus tali* (see below). Like  
502 *H. floridanus*, the same facets are highly asymmetrical but in *S. hondaensis* this condition is  
503 even extreme as the ectal facet is much larger than the sustentacular facet. Additionally, the  
504 shape of these facets is disparate between them, i.e. kidney-shaped ectal facet and sub-oval  
505 sustentacular facet. The ectal facet is located at an oblique angle with respect to the long  
506 axis of the tuber calcanei, unlike *H. floridanus* and similar to *Dasyopus*. Like other  
507 pamphateriids, the sustentacular facet of the calcaneum of *S. hondaensis* is located  
508 anteriorly to the anterior border of the ectal facet. However, this facet is even more  
509 anteriorly placed than in other species as consequence of the wide *sulcus tali* that separates  
510 the ectal facet with respect to the sustentacular one. Posteriorly, the calcaneal tuber is not  
511 massive in comparison with late diverging species of *Holmesina* (e.g. *H. septentrionalis*  
512 and *H. paulacoutoi*), but rather it is slender because a mediolateral compression,  
513 particularly towards its dorsal side.

514 *Stratigraphic and geographical distribution:* Possibly the Castilletes Formation, upper  
515 Lower to lower Middle Miocene, upper Burdigalian to Langhian, Department of La  
516 Guajira, Colombia (Fig. 9C); La Victoria and Villavieja Formation, upper Middle Miocene,  
517 Serravalian, Department of Huila, Colombia (Edmund & Theodor 1997).

518

519 *Scirrotherium antelucanus* Laurito & Valerio, 2013

520 *LSID.* urn:lsid:zoobank.org:act:225CD304-3B63-4B55-B8B8-33B46C90A194

521 *Holotype:* CFM-2867, mobile osteoderm.

522 *Type locality and horizon:* San Gerardo de Limoncito, Coto Brus county, Puntarenas  
523 Province, Costa Rica. Upper Curré Formation, Upper Miocene. For further information  
524 about the stratigraphic position of the Curré Formation, see these references: Lowery 1982;  
525 Yuan 1984; Rivier 1985; Kolarsky et al. 1995; Alvarado et al. 2009; Aguilar et al. 2010;  
526 Obando 2011. There are no absolute ages for this geological unit.

527 *Referred material:* MUN STRI 36880, an isolated fixed osteoderm (Fig. 8).

528 *Stratigraphic and geographical provenance:* Upper Sincelejo Formation, Upper Miocene  
529 to Pliocene (Messinian to Zanclean). El Coley Town, Municipality of Los Palmitos,  
530 Department of Sucre, Colombia. For further information about the stratigraphic position of  
531 the Sincelejo Formation, see these references: Flinch 2003; Villarroel & Clavijo 2005;  
532 Bermúdez et al. 2009; and Alfaro & Holz 2014. There are no absolute ages for this  
533 geological unit.

534 *Diagnosis:* Unmodified (see Laurito & Valerio, 2013; p. 47).



535 *Comparative description:* The fixed osteoderm of the pelvic shield MUN STRI 36880 is  
536 assigned to the species *S. antelucanus* on the basis of the following observations: (I) the  
537 area and thickness of this osteoderm (linear measurements in millimetres: anteroposterior  
538 length = 34.91; transverse width = 24; thickness = 4.45; approximate area = 837.8 mm<sup>2</sup>) are  
539 within the range of variability for comparable osteoderms of *S. antelucanus* and exceed the  
540 known values of area for most of the same kind of osteoderms for *S. hondaensis*; (II) the  
541 external surface is relatively smooth; (III) the AM is wide; (IV) the anterior foramina are  
542 larger (2–3 millimetres of diameter) than in *S. hondaensis*, like *S. antelucanus* from Costa  
543 Rica; (V) the number of anterior foramina (9) is within the range of variability for *S.*  
544 *antelucanus* (7–10 for quadrangular osteoderms, as the specimen here described), greater  
545 than in *S. hondaensis*; (VI) poorly elevated LCE, even superficial, like in some osteoderms  
546 of *S. antelucanus* (generally LCE more elevated in *S. hondaensis*; see Laurito & Valerio  
547 2013).

548 *Stratigraphic and geographical distribution:* Curré Formation, Upper Miocene, Puntarenas  
549 Province, Costa Rica (Laurito & Valerio 2013); Sincelejo Formation, Upper Miocene to  
550 Lower Pliocene, Messinian to Zanclean, Department of Sucre, Colombia.

551

552 aff. *Scirrotherium*

553 *Referred material:* MUN STRI 16718 (Fig. 9A), fixed osteoderm of the scapular shield;  
554 MUN STRI 38064 (Fig. 9E), undetermined fixed osteoderm; MUN STRI 16719 (Fig. 9G),  
555 mobile osteoderm fragmented in its AM.

556 *Stratigraphic and geographical provenance:* Castilletes Formation, upper Lower Miocene  
557 to lower Middle Miocene, upper Burdigalian to Langhian). Localities of Makaraipao,  
558 Kaitamana and Patajau Valley (localities with numbers 390093, 430202 and 390094 in  
559 Moreno et al. 2015, respectively), Municipality of Uribia, Department of La Guajira,  
560 Colombia.

561 *Comparative description:* The fixed osteoderm of the scapular shield MUN STRI 16718  
562 (Fig. 9A) is relatively large and has a pentagonal outline. Its linear measurements in  
563 millimetres are: anteroposterior length = 45.02; transverse width = 33.41; thickness = 6.66.  
564 These values imply that this osteoderm has greater area than any other known area size for  
565 osteoderms referred to *Scirrotherium* (Table 1), including those of the osteoderms of the  
566 larger *Scirrotherium* species, i.e. *S. antelucanus* (see Appendix 1 in Laurito & Valerio  
567 2013). Rather, this osteoderm size is similar to those reported for *H. floridanus* and *P.*  
568 *humboldtii*. The external surface of the osteoderm MUN STRI 16718 is punctuated by  
569 numerous diminutive pits, like *S. hondaensis* and *S. antelucanus*. In this surface it is not  
570 possible to differentiate a LCE nor LDs, in such a way the osteoderm has a flattened  
571 appearance, similar to the case of several osteoderms of *S. antelucanus* (Laurito & Valerio  
572 2013). In contrast, the MEs are clearly recognizable. These ridges are relatively low and  
573 narrow. There are foramina with a nearly homogeneous large size in the AM. They are  
574 aligned in two well defined rows. The most anterior row has five foramina and the posterior  
575 to this one has six. Collectively, the two foramina rows are equivalent to ~25% of the  
576 anteroposterior length of the osteoderm. In *Scirrotherium*, the foramina rows of fixed  
577 osteoderm, when present, this percentage is less than 20%.

578 MUN STRI 38064 (Fig. 9E): This osteoderm has a trapezoidal outline and the following  
579 measurements in millimetres: anteroposterior length = 39.08; transverse width = 39.55;  
580 thickness: 5.98. These values are within the range of variability of *S. antelucanus*. This  
581 osteoderm has two long rows of anterior foramina of which the posterior row seems to  
582 extend partially over the anterior LMs, unlike the anterior foramina row(s) in *S. hondaensis*  
583 and *S. antelucanus*. The most anterior foramina row is formed by eight foramina and the  
584 posterior to this one has 11 foramina. In both of these rows, foramina have similar size  
585 between them, although a few ones are comparatively tiny. The foramina rows diverge on  
586 the left LM and within the resultant space is located a large and isolated foramen, i.e. not  
587 clearly aligned with any row. This osteoderm does not have recognizable LCE nor LDs, i.e.  
588 it is flattened. Its MEs are narrow and poorly elevated. The foramina of LMs are smaller  
589 than most of anterior foramina. As consequence of preservation factors, expected pits on  
590 the external surface are not present.

591 MUN STRI 16720 (Fig. 9G): This partial mobile osteoderm has an elongated rectangular  
592 shape. Its linear measurements in millimetres are: anteroposterior length (incomplete by  
593 fragmentation) = 45.68; transverse width = 30.69; thickness = 6.96. The external surface is  
594 convex and without LCE nor LDs. The AM shows an apparently unordered foramina set.

595 *Discussion:* With current evidence, the former material should not be confidently assigned  
596 to *Scirrotherium* and even less so to create a monospecific genus. This taxonomical  
597 decision is supported by several arguments. First, morphologically, the osteoderms here  
598 referred to aff. *Scirrotherium* are more similar to those of *S. hondaensis* and *S. antelucanus*  
599 than to any other osteoderms of known pampatheriids. The osteoderms of aff.  
600 *Scirrotherium* fundamentally differ with respect to the osteoderms of *S. hondaensis* and *S.*

601 *antelucanus* in three characteristics: (I) greater number of anterior foramina and/or greater  
602 development of two rows from these foramina; (II) LCE possibly absent, i.e. flattened  
603 external surface; (III) larger maximum osteoderm area. Of these features, the third one (III)  
604 is the less ambiguous, i.e. the maximum area of fixed osteoderms exceeds those of the  
605 osteoderms of *S. hondaensis* and *S. antelucanus*. Comparatively, the first and second (I and  
606 II) characteristics are more ambiguous considering that similar conditions were also  
607 observed in *S. hondaensis* and *S. antelucanus*. These conditions are described as follows.  
608 Some infrequent osteoderms of *S. hondaensis* have two anterior foramina rows, of which  
609 the most anterior row is comparatively less developed (i.e. less foramina and smaller) than  
610 in aff. *Scirrotherium*. Additionally, in *S. hondaensis* and, particularly in *S. antelucanus*,  
611 some osteoderms have flattened and diffuse LCE, even apparently absent. These  
612 observations imply limitations on the taxonomical resolution, especially considering that  
613 the material on which is based aff. *Scirrotherium* is scarce and it does not allow  
614 comparisons from a representative osteoderm series of the morphological variability within  
615 the carapace of this animal.

616

617 Genus *Kraglievichia* Castellanos, 1927

618 *LSDI*. urn:lsid:zoobank.org:act:92C8B169-4F79-467E-B951-EF1DE6E327B1

619 *Type species: Kraglievichia paranensis* Ameghino, 1883

620 *Included species:* In addition to the type species, *Kraglievichia carinatum* comb. nov.

621 *Emended differential diagnosis:* Small-to-middle sized pampatheriid characterized by fixed  
622 osteoderms with ornamentation (particularly the LCE) more conspicuous than in any other

623 pampatheriid; anteriorly wide posteriorly tapered LCE; very deep LDs; highly elevated and  
624 frequently blunt MEs, even flattened towards their top; external surface of osteoderms  
625 generally rougher than in *Scirrotherium* but less than in *Holmesina*.

626

627 *Kraglievichia carinatum* comb. nov.

628 *Synonyms*: *Scirrotherium carinatum* (Góis et al. 2013).

629 *Holotype*: MLP 69-IX-8-13-AB, a mobile osteoderm.

630 *Type locality and horizon*: Paraná River cliffs, Entre Ríos Province, Argentina. Ituzaingó  
631 Formation, Upper Miocene, Tortonian.

632 *Referred material*: In addition to the holotype, the paratypes and part of the hypodigm of  
633 this species (see Fig. 10 and Appendix S1 of the Supplementary Material).

634 *Differential diagnosis*: Unmodified (see Góis et al. 2013, p. 182).

635 *Discussion*: In their descriptive work on *K. carinatum* comb. nov., Góis et al. (2013) did  
636 not explicitly justify the inclusion of this species within *Scirrotherium*. Interestingly, part of  
637 the material assigned to the taxon they create, coming from northwestern Brazil (Solimões  
638 Formation), was previously referred to *Kraglievichia* sp. by several researchers, including  
639 Góis himself (Góis et al. 2004; Góis 2005; Cozzuol 2006; Latrubesse et al. 2010; Góis et al.  
640 2013). However, Góis et al. (2013) refuted the original taxonomical assignment arguing  
641 this was erroneous, although they did not offer any concrete support for their decision. In  
642 absence of a phylogenetic analysis in Góis et al. (2013), we could assume by default that  
643 these authors included to *K. carinatum* comb. nov. within *Scirrotherium* because they

644 considered osteodermal features of this species are at least compatible with the generic  
645 diagnosis proposed by Edmund & Theodor (1997). Additionally, based on morphological  
646 similarity, Góis and colleagues could have hypothesized closer affinities between *K.*  
647 *carinatum* comb. nov. and *S. hondaensis* than those between *K. carinatum* comb. nov. and  
648 *K. paranensis*.

649 Let do us analyse in detail each of the osteodermal features of *K. carinatum* comb. nov. in  
650 relation to the original diagnosis of *Scirrotherium*. According to Edmund & Theodor  
651 (1997), the fixed osteoderms of *Scirrotherium* have a small (not specified) number of large  
652 piliferous foramina on the AM. These foramina are well spaced and interconnected  
653 between them by a distinct channel. This is observed both in *K. carinatum* comb. nov. and  
654 *S. hondaensis*. Likewise, the presence of continuous MEs, posteriorly confluent with the  
655 LCE, is a trait also shared by the compared species. Finally, the relative osteoderm size of  
656 *K. carinatum* comb. nov. is small among pampatheriids, which is in line with the original  
657 diagnosis for *Scirrotherium*.

658 In consequence, the osteodermal features of *K. carinatum* comb. nov. are compatible with  
659 those mentioned in the diagnosis for *Scirrotherium* by Edmund & Theodor (1997).  
660 However, this does not necessarily imply that the taxonomical allocation of *K. carinatum*  
661 comb. nov. in the genus *Scirrotherium* is correct. In fact, there are several reasons to  
662 consider this is not reliable. Initially, the diagnosis of Edmund & Theodor (1997) contains  
663 only three allegedly diagnostic features on osteoderms, including the relative osteodermal  
664 size. Furthermore, and more importantly, these “diagnostic features” do not allow to  
665 discriminate between *Scirrotherium* and any other genus of pampatheriids. Indeed, in their  
666 analysis, Góis et al. (2013) accept that, for instance, the species *Vassallia minuta* also

667 shares the condition about fixed osteoderms with a small number of large anterior foramina,  
668 which are well spaced and connected through a distinguishable canal. Independently,  
669 Laurito & Valerio (2013) also highlighted the non-diagnostic nature for *Scirrotherium* of  
670 the former osteodermal trait. The other osteodermal features under consideration, i.e. the  
671 posterior confluence of the MEs with the LCE and the small osteodermal size, are also  
672 ambiguous for positive identification of *Scirrotherium*. For instance, the confluence of MEs  
673 and LCE is also found in *K. paranensis*, a pampatheriid clearly different from  
674 *Scirrotherium*. And although apparently informative on body-size trends of some individual  
675 pampatheriid lineages (e.g. *Holmesina* spp.) and useful as discriminant factor between  
676 species (Góis et al. 2013; Laurito & Valerio 2013), the relative osteodermal size is not  
677 necessarily insightful in itself to make taxonomical decisions on grouping species in one  
678 single genus (see below). In this sense, it is noteworthy the potentially conflictive  
679 taxonomical conclusions based predominantly on osteoderm-inferred relative body size in  
680 relation with interpretations from non-osteodermal evidence. Thus, for example, the femur  
681 MLP 69-IX-8-13A (an adult specimen), which comes from the Ituzaingó Formation and  
682 was assigned to *K. cf. paranensis* by Scillato-Yané et al. (2013), is comparable in size to  
683 that of *S. hondaensis*, i.e. a small pampatheriid. Then, keeping in mind the medium-to-large  
684 body size of *K. paranensis*, is probable that the referred femur does not belong to the  
685 species *K. paranensis*, although it is reasonable to include it in the genus *Kraglievichia* (as  
686 the authors decided). However, Scillato-Yané et al. (2013) did not discuss the possibility  
687 that the material assigned to *K. cf. paranensis*, particularly the specimen MLP 69-IX-8-  
688 13A, has any relationship with the (partially) sympatric species of *K. paranensis*, i.e. *K.*  
689 *carinatum* comb. nov., a pampatheriid whose small body size is fully compatible with the  
690 small size of that femur. In other words, like Góis et al. (2013), they did not seriously

691 consider the hypothesis of *K. carinatum* comb. nov. as a small species of *Kraglievichia*,  
692 rather than a species belonging to *Scirrotherium*.

693 Again analysing the original diagnosis for *Scirrotherium* by Edmund & Theodor (1997), it  
694 should be regarded as ambiguous and hardly useful to differentiate this genus from other  
695 genera in Pamphateriidae, at least with respect to osteodermal traits. Probably these  
696 supposedly diagnostic features are actually symplesiomorphies for genera of the family or,  
697 at most, a hypothetical subfamilial lineage. This means that Góis et al. (2013) did not have  
698 a minimally strong taxonomical background from the original diagnosis of *Scirrotherium* to  
699 assign *K. carinatum* comb. nov. to this genus. Alternatively, they may have noticed  
700 morphological similarity between osteoderms of *K. carinatum* comb. nov. and *S.*  
701 *hondaensis* from features not included in the diagnosis by Edmund and Theodor.

702 Nevertheless, on their publication, these authors only listed multiple morphological  
703 differences between the former species and virtually did not mention any similarity for  
704 them, except for potentially equivocal resemblance as that indicated by relative osteodermal  
705 size (i.e. small osteodermal sizes in comparison with those of *K. paranensis* and *Plaina*).

706 The lack of usefulness of the relative osteodermal size for generic assignation is further  
707 supported by the osteodermal morphometric analysis in Góis et al. (2013, p. 185), whose  
708 resulting PCA and CCA plots show that, despite the similarity in relative osteodermal size,  
709 *K. carinatum* comb. nov. is located far from *S. hondaensis* (which is closer to *V. minuta*, a  
710 taxon apparently related to other main lineage within Pamphateriidae, i.e. *Plaina-*  
711 *Pamphaterium*) and *K. paranensis* in morphospace.

712 Summarizing, there is no solid, possible justification by Góis et al. (2013) on their  
713 taxonomical decision to including *K. carinatum* comb. nov. within *Scirrotherium*. The



714 observation of a common general morphological pattern between *K. carinatum* comb. nov.  
715 and *S. hondaensis* does not necessarily imply the grouping of these species under the same  
716 generic taxon. Furthermore, we should note that Góis and colleagues, in their work on *K.*  
717 *carinatum* comb. nov., did not make morphological comparisons including to *S.*  
718 *antelucanus*, a species more similar in osteodermal features to *S. hondaensis* (i.e. the type  
719 species of *Scirrotherium*). The species *S. antelucanus* was described on a scientific article  
720 (Laurito & Valerio 2013) published nearly simultaneously, but later, to that of *K. carinatum*  
721 comb. nov. Therefore, Góis et al. (2013) did not know about the existence of *S. antelucanus*  
722 when they performed their systematic analysis (“Until the present study, *S. hondaensis* was  
723 the only known species of this genus”; Góis et al. 2013, p. 177), so that their taxonomical  
724 assignment of *K. carinatum* comb. nov. to *Scirrotherium* was biased by limited notions on  
725 the morphological variability and diversity of *Scirrotherium* in northern South America and  
726 southern Central America.

727 In this work I decide to assign *K. carinatum* comb. nov. to the genus *Kraglievichia* based  
728 on results of a phylogenetic analysis that I designed considering the hypothesis of Edmund  
729 (1985) on the probable subfamilial relationships within Pampatheriidae, which implicitly  
730 sustains that the creation of supraspecific taxa from osteodermal evidence should be  
731 determined –with the prerequisite of morphological similarity- by the degree of  
732 development of the ornamentation. Understanding that *K. carinatum* comb. nov. has  
733 morphologically similar osteoderms to those of *K. paranensis* (apart from relative  
734 osteoderm size) and has one of the more conspicuous, protuberant osteodermal  
735 ornamentations among pampatheriids, along with *K. paranensis*, as acknowledged by Góis  
736 et al. (2013) themselves, this means that *K. carinatum* comb. should be considered closely

737 related to *K. paranensis* and therefore they both should also be included in the same genus,  
738 i.e. *Kraglievichia*.

739 *Stratigraphic and geographical distribution:* Ituzaingó Formation, Upper Miocene,  
740 Tortonian, Entre Ríos Province, Argentina; Puerto Madryn Formation, Upper Miocene,  
741 Tortonian, Chubut Province, Argentina; Solimões Formation, Upper Miocene, Tortonian,  
742 Acre State, Brazil (Góis et al. 2013).

743

#### 744 **Discussion**

745 This systematic analysis is the first attempt to test the intergeneric relationships and internal  
746 structure of the genus *Scirrotherium* with its three previously referred species, i.e. *S.*  
747 *hondaensis* (type species), '*S.*' *carinatum* (= *K. carinatum* comb. nov.) and *S. antelucanus*.  
748 The two strict consensus trees from the distinct character weighting schemes (equal and  
749 implied weights) show very similar results. However, the preferred general phylogenetic  
750 hypothesis is that supported by the implied weights analysis. According to Goloboff et al.  
751 (2018), the parsimony analysis under implied weights outperforms equal weighting and the  
752 model-based methods. This performance inference for the implied weights method is  
753 empirically supported here. Beyond this preference for a particular hypothesis (further  
754 supported below), both resultant trees agree that all the species referred to *Scirrotherium*  
755 are not monophyletic and, consistently, from a diagnostic point of view only *S. hondaensis*  
756 and *S. antelucanus* appears as those actually referable to *Scirrotherium*. The relationships  
757 between *S. hondaensis* and *S. antelucanus* could not be confidently resolved, despite the  
758 inclusion of new osteodermal characters (the only ones comparable between these species

759 so far) in these parsimony analyses. According to the majority-rule consensus tree obtained  
760 from the bootstrap resampling, *S. antelucanus* is not the sister taxon of *S. hondaensis*, but it  
761 is basal to the clade *S. hondaensis* + '*S. carinatum*' (= *K. carinatum* comb. nov) + *K.*  
762 *paranensis*. However, this clade has low resampling frequency. The basal position of *S.*  
763 *antelucanus* within the majority-rule consensus tree is explained to a great extent by a large  
764 number of missing entries for *S. antelucanus* in the character matrix. Nevertheless, a non-  
765 monophyletic relationship among *S. hondaensis* and *S. antelucanus* should not be rule out.  
766 In conjunction, these results suggest the need of information on craniomandibular or dental  
767 characters for *S. antelucanus* to test its relationship with respect to *S. hondaensis*. Until new  
768 phylogenetic evidence, the genus *Scirrotherium* is maintained as taxonomically valid using  
769 a new, emended diagnosis which focus on its lesser degree of development of the  
770 osteodermal ornamentation in comparison with those in *Holmesina* and, particularly,  
771 *Kraglievichia*. This new diagnosis replaces the original and now inadequate diagnosis of  
772 Edmund & Theodor (1997). Composed of *S. hondaensis* and *S. antelucanus*, *Scirrotherium*  
773 is considered a coherent taxonomical generic unit according to the criteria of morphological  
774 homogeneity and similarity in geographical and chronostratigraphic distributions of its  
775 species.

776 Unlike the unpublished phylogeny of Góis (2013), the phylogenetic position of '*S.*'  
777 *carinatum* was resolved here, i.e. this species is the sister taxon of *K. paranensis*.  
778 Therefore, it is proposed the new name *K. carinatum* comb. nov. Despite Góis (2013) did  
779 not recover as a clade to *S. hondaensis* and *K. carinatum* comb. nov., as expected if both  
780 these species were assigned to *Scirrotherium*, he presented one supposed synapomorphy  
781 that join them, i.e. very deep LDs, "in particular in *S. carinatum*" (Góis 2013, p. 215). This

782 feature is not a confident support for grouping *S. hondaensis* and *K. carinatum* comb. nov.  
783 because the deepest LDs in this main pampatheriid lineage are found in *K. carinatum* comb.  
784 nov. and *K. paranensis*, not in *S. hondaensis*. The new emended differential diagnosis for  
785 *Kraglievichia* acknowledges the highly sculpted external osteoderm surface documented on  
786 this taxon, which is more protuberant than in the Plio-Pleistocene genus *Holmesina*. This  
787 diagnosis provides an updated and concise description of useful osteoderm features to  
788 distinguish *Kraglievichia* from other genera within Pampatheriidae. It is important to note  
789 that the species *K. paranensis* has several autapomorphies (see Appendix S4 of the  
790 Supplementary Material) which, in addition to the relative osteoderm size, need to be  
791 compared in the future with homologous, unknown (cranial) traits in *K. carinatum* comb.  
792 nov. in order to test the phylogenetic closeness of these two species as inferred from  
793 osteodermal traits. Provisionally, the difference in relative osteodermal size (consequently  
794 also in relative body size) and some morphological differences between *K. carinatum*  
795 comb. nov. and *K. paranensis*, as those noted by Góis et al. (2013), may be linked to  
796 distinct ontogenetic growth trajectories in these species, being plesiomorphic in nature that  
797 of *K. carinatum* comb. nov. (i.e. small body size; see Sánchez-Villagra 2012 for a  
798 discussion on the implications for taxonomy of the ontogenetic growth in extinct species).  
799 This hypothesis could be extrapolated in some way to the species *S. hondaensis* and *S.*  
800 *antelucanus*.

801 An important difference here with respect to the phylogeny of Góis is that *K. paranensis*  
802 was not recovered as the one single sister taxon of *Holmesina* spp. (except *H. floridanus*).  
803 Instead, it is part of a group additionally formed by *S. hondaensis*, *S. antelucanus* and *K.*  
804 *carinatum* comb. nov. Together, these taxa are possibly the sister clade of *Holmesina*. This

805 means that we do not have evidence of direct ancestral forms to *Holmesina* yet. However,  
806 despite some striking differences, it is remarkable the greater morphological similarity  
807 between the osteodermal ornamentation and cranial features of *Holmesina* (especially *H.*  
808 *floridanus*) and *Scirrotherium*, rather than with those of *Kraglievichia*. The recognizable  
809 similarities between *H. floridanus* and *S. hondaensis*, and at the same time differences with  
810 *K. paranensis*, include a less protuberant osteodermal ornamentation; occurrence of  
811 uniformly narrower LCE in some osteoderms; more robust skull; more expanded frontals;  
812 frontals in a clearly different plane with respect to the parietals; less anteroposteriorly  
813 elongated upper teeth; first two upper molariforms less obliquely oriented with respect to  
814 the midline of the hard palate; among others.

815 Apart from that, Góis (2013) found that *Holmesina* is non-monophyletic by the  
816 phylogenetic position of *H. floridanus* with respect to the clade groups the other *Holmesina*  
817 species. This result coincides with that recovered here from the parsimony analysis with  
818 equal weights. The species *H. floridanus* has several plesiomorphic features in comparison  
819 with the remaining *Holmesina* species, e.g. less protuberant ornamentation, less rough  
820 external surface of the osteoderms and less dorsal basicranium. However, the arrangement  
821 of the calcaneal facets of the astragalus in *H. floridanus* (confluent facets) suggests that this  
822 species is not directly related to any known South American pampatheriid (Edmund 1987).  
823 Likewise, Gaudin & Lyon (2017) have recently found support for the monophyly of  
824 *Holmesina* from craniomandibular specimens. Therefore, the position of *H. floridanus* in  
825 polytomy with *S. hondaensis* and *S. antelucanus* within the topology of the resultant tree  
826 with equal weights is explained from the lack of enough resolution of the analysis  
827 (homoplastic noise), not as product of a “real” distant relationship with the remaining

828 *Holmesina* species. Conversely, the genus *Holmesina* is recovered as monophyletic by the  
829 implied weights analysis. As expected, in this topology *H. floridanus* is the most basal  
830 species of *Holmesina*. In both strict consensus trees, *H. septentrionalis*, the later diverging  
831 North American species, is grouped together with all the South American *Holmesina*  
832 species (except *H. rondoniensis*, not included in this study).

833 I abstained from revise the diagnosis of the genus *Holmesina* because this is considered  
834 beyond the intended objectives of this work. However, six putative synapomorphies  
835 (unambiguous and ambiguous) are proposed (or further supported) for this genus: (1)  
836 Anterior and lateral margins with elongated, strong bone projections as radii directed from  
837 the external border of the central figure towards the osteodermal borders in non-marginal  
838 fixed osteoderms; (2) anteriorly convergent, nearly in contact medial processes of  
839 premaxillae; (3) length of nasals greater than 30% of the maximum anteroposterior length  
840 of the skull; (4) conspicuous and anteroposteriorly elongated maxillary ridge (Gaudin &  
841 Lyon 2017); (5) reduced lacrimal; and (6) bilobed posterior upper molariforms (Mf5-Mf9)  
842 with incipient trilobulation.

843

#### 844 **Evolutionary and biogeographical implications**

845 *Scirrotherium* is a pampatheriid genus from the Early Miocene-Late Pliocene of northern  
846 South America and southern Central America. This taxon, along with *Kraglievichia*,  
847 conforms the sister evolutionary line of that gave origin to *Holmesina* (Fig. 12), a  
848 pampatheriid probably originated in tropical southern North America (Mexico? see  
849 Woodburne 2010). However, based on the osteological comparisons presented above,

850 which are expanded with respect to those of Edmund (1987), the hypothetical South  
851 American ancestor or sister taxon of *Holmesina* probably was morphologically generalized,  
852 more similar to *Scirrotherium* or aff. *Scirrotherium* than to *Kraglievichia*. This  
853 interpretation is in line with that of Edmund (1987), according to which the calcaneo-  
854 astragalar articulation of *S. hondaensis* precludes that this pampatheriid is ancestral to *H.*  
855 *floridanus*, but the ornamentation pattern of the osteoderms suggests “at least some degree  
856 of relationship” with the latter species. The genus *Kraglievichia* should be considered a  
857 highly, anatomically divergent taxon, especially to taking into account its Miocene age. In  
858 Edmund’s words, “the osteoderms [of *H. floridanus*] are quite dissimilar to those of  
859 *Kraglievichia*” (Edmund 1987, p. 16). This interpretation is partially in conflict with that of  
860 Scillato-Yané et al. (2005), according to which *Holmesina* originated from a hypothetical  
861 (i.e. not recorded yet) South American basal form of *Holmesina* or *Kraglievichia*. It also is  
862 opposed to Simpson (1930) and to the phylogeny of Góis (2013) in which *Kraglievichia* is  
863 the sister taxon of *Holmesina*.

864 The earliest record of *Scirrotherium*, here treated as tentative by scarce and bad-preserved  
865 material, comes from the Early Miocene (late Burdigalian) of northwestern Venezuela  
866 (Rincón et al. 2014; see below). Independently from the validity of occurrence of  
867 *Scirrotherium* in an Early Miocene locality of northern South America, this record  
868 represents the oldest pampatheriid reported in the scientific literature so far. This  
869 improvement in the fossil record of Pampatheriidae makes it more congruent with the  
870 expected time of origination of this family, i.e. Late Oligocene-Early Miocene, according to  
871 the very few available time-calibrated phylogenies including representatives of  
872 Pampatheriidae and its sister group, i.e. Glyptodontidae (e.g. Fernicola 2008; Billet et al.

873 2011). Apparently, the Early Miocene Venezuelan pampatheriid indicates an origin of these  
874 xenartrons in low latitudes in South America. However, this hypothesis could be challenged  
875 by a possible Late Eocene pampatheriid of Argentina, which has been not formally  
876 described and published yet (Góis 2013).

877 Beyond the geographical origin of Pampatheriidae, northern South America seems to have  
878 been a critical area for the early diversification of, at least, a main lineage of pampatheriids,  
879 i.e. that including *Scirrotherium*. This genus probably differentiated at least as early as the  
880 late Early Miocene-early Middle Miocene (late Burdigalian-Langhian) in northernmost  
881 South America. The former evolutionary inference is consistent with the late Early  
882 Miocene record referred to *Scirrotherium* from Venezuela (Rincón et al. 2014).

883 Collectively, *Scirrotherium* and *Kraglievichia* occupied a large area in South America  
884 during the Neogene (Fig. 13). The geographical range of *Scirrotherium* was more restricted  
885 than that of *Kraglievichia*, comprising only tropical low latitudes, instead of a wide  
886 latitudinal range, as suggested by Góis et al. (2013). The reevaluated distributional pattern of  
887 *Scirrotherium* is comparable to that of the glyptodontid *Boreostemma*, which is recorded  
888 from the Middle Miocene to the Late Pliocene of Colombia and Venezuela (Carlini et al.  
889 2008; Zurita et al. 2016). In contrast, the distributional range of *Kraglievichia* is similar to  
890 that of other Miocene xenartron taxa at the generic and specific level which occurred in  
891 southern South America and northwestern Brazil, but not in the northern or northwestern  
892 end of South America (see Ribeiro et al. 2014).

893 Overall, this evidence indicating biogeographical divergence of northwesternmost South  
894 America as an independent faunal province, from the late Early Miocene to Middle  
895 Miocene and possibly until the Late Miocene to Pliocene, is consistent with the results of



896 multiple analyses of the South American terrestrial mammal fossil record for the Neogene  
897 (Patterson & Pascual 1968; Cozzuol 2006; Ortiz-Jaureguizar & Cladera 2006; Croft 2007;  
898 Carrillo et al. 2015; Rincón et al. 2016; Kerber et al. 2017; Brandoni et al. 2019).  
899 Apparently, the existence of one or several strong geographical and/or ecoclimatic barriers  
900 (e.g. the Pebas Mega-Wetland System, whose expansion climax coincides with the Middle  
901 Miocene) in northern South America would explain that regional endemism pattern  
902 (MacFadden 2006; Croft 2007; Salas-Gismondi et al. 2015; Jaramillo et al. 2017). At the  
903 same time, the development of a late Early-to-Middle Miocene biogeographical divergence  
904 between northwesternmost South America and the rest of this continent may account for  
905 the evolutionary (morphological) divergence of the genera *Scirrotherium* and  
906 *Kraglievichia*.

907 In the Late Miocene, without a completely formed PLB (O’dea et al. 2016), *Scirrotherium*  
908 expanded its geographical range to southern Central America (Fig. 13), suggesting a  
909 hypothetical ephemeral land connection (i.e. land span) or, more likely, overwater dispersal  
910 between South America and Central America (maybe via rafting mechanism; efficient  
911 active swimming of a pampatheriid in a marine channel seems highly improbable). This is  
912 the earliest dispersal event of a pampatheriid to North America (see below). The Central  
913 American species of *Scirrotherium*, *S. antelucanus*, is larger than *S. hondaensis*, but  
914 comparable or even smaller than aff. *Scirrotherium*. From available evidence, it is not  
915 possible to determinate the most probable area of evolutionary differentiation of *S.*  
916 *antelucanus*, but now there is support for occurrence of this species in the late Neogene of  
917 northwestern South America, specifically in the Department of Sucre, Colombia.

918 The South American record of *S. antelucanus* is probably several million years younger (3–  
919 5 my) than the Central American record. However, given the lack of absolute dating for the  
920 fossil-bearing stratigraphic levels and the occurrence of Late Miocene strata in the same  
921 geological unit (Sincelejo Formation) where comes the material here assigned to *S.*  
922 *antelucanus* in Colombia, it should be recognized a significant age uncertainty for the new  
923 South American record of this species. In any case, this age is considered may be Early  
924 Pliocene or, alternatively, Latest Miocene from the stratigraphic position of the fossil-  
925 bearing horizons (Villarroel & Clavijo, 2005; Bermúdez et al. 2009; Alfaro & Holz 2014;  
926 Bernal-Olaya et al. 2015; Córtes et al. 2018), as well as from associated palynomorphs  
927 (Silva et al. 2012; B. Fernandes & C. Jaramillo, pers. comm. 2014).

928 The biogeographical correlation across the Isthmus of Panama using *S. antelucanus* has  
929 insightful implications for the understanding of the late Cenozoic intercontinental migratory  
930 dynamics in the Americas, including the Great American Biotic Interchange (GABI) (Webb  
931 2006; Woodburne et al. 2006; Woodburne 2010; Cione et al. 2015; Bloch et al. 2016).  
932 Noteworthy, this is the first transisthmian biogeographical correlation for a Neogene  
933 terrestrial mammal at the level of species; furthermore, it is the first short-distance  
934 intercontinental correlation (i.e. adjacent to the Central American Seaway) with high  
935 taxonomical resolution for Neogene land mammals of the Americas; and, finally, it  
936 constitutes the first evidence of a distributional pattern congruent with a re-entry event to  
937 South America by a pre-Pleistocene xenartran.

938 We subsequently analyse in more detail these implications. So far, we know a few  
939 biogeographical correlations across the Isthmus of Panama which are based on records at  
940 generic level of Neogene and Pleistocene land mammals, as well as a very few records at

941 species level of the latter epoch. The Neogene biogeographical correlations include the  
942 pampatheriid genera *Plaina*, in Mexico and central-southwestern South America;  
943 *Pampatherium*, in Mexico and southeastern South America; and *Holmesina*, in United  
944 States, Mexico and El Salvador, as well as in northwestern and southeastern South America  
945 (Woodburne 2010). At the level of species, for instance, the Pleistocene megatheriine  
946 *Eremotherium laurillardi* has occurrence in both sides of the Isthmus of Panama in North-  
947 and South America (Cartelle & De Iuliis 1995, 2006; Tito 2008; McDonald & Lundelius,  
948 E. L. Jr. 2009; Martinelli et al. 2012; Cartelle et al. 2015).

949 The record in South America of *S. antelucanus* increase the taxonomical resolution of  
950 transisthmian biogeographical correlations of Neogene land mammals, opening the  
951 possibility of new correlations of this kind and their biostratigraphic application in circum-  
952 Caribbean basins, in a similar way as envisioned by the renowned American  
953 palaeontologist Ruben A. Stirton from his revision of the fossil mammal remains of “La  
954 Peñata fauna” (Stirton 1953), the vertebrate fossil association where comes the new record  
955 of *S. antelucanus*. This translates into direct correlation of Land Mammal Ages (in this  
956 case, SALMA and NALMA) from migrant mammals which are shared at species level by  
957 both South and North America. Using to *S. antelucanus*, this would mean exists a support  
958 for faunal, not necessarily chronological, correlation of the early Hemphillian and  
959 Montehermosan mammal (xenartran) assemblages in North America and South America,  
960 respectively (see Laurito & Valerio, 2013). Nevertheless, naturally, any solid  
961 intercontinental faunal correlation implies more than only one taxonomical element for  
962 support. The direct intercontinental faunal correlations from Cenozoic land mammals  
963 between South and North America are still underdeveloped in comparison with those

964 between other continents (e.g. North America and Europe or North America and Asia;  
965 Woodburne & Swisher, C. C. III 1995; Beard & Dawson 1999; Bowen et al. 2002)  
966 Additionally, the transisthmian correlation of *S. antelucanus* allows to increase the  
967 geographical resolution in detection of intercontinental migrations of late Cenozoic land  
968 mammals, which are restricted mainly to large and middle distance correlations for the  
969 Neogene record (e.g. Mexico-southern South America; Woodburne 2010). This pattern has  
970 prevented the exploration of possible early or intermediate phases of  
971 anagenetic/cladogenetic events in late Cenozoic Interamerican migrant taxa, which in turn  
972 it is reflected in the fact that we are detecting “suddenly” well-differentiated terminal taxa  
973 (e.g. *Holmesina*) in marginal, distant areas with respect to the Central American Seaway  
974 and adjacent terrains (Cione et al. 2015 and references therein).

975 On other hand, the new transisthmian correlation here presented suggests a possible  
976 Neogene re-entry event by a xenartran to South America after its evolutionary  
977 differentiation in North America (Fig. 13). The confirmation of this depends on a confident  
978 determination of the differentiation area for *S. antelucanus*, i.e. if this species originated in  
979 South America, the new record is explained more parsimoniously by population  
980 maintenance in the ancestral area. Conversely, if this species originated in Central America  
981 from a South American species of *Scirrotherium* as *S. hondaensis*, then we are considering  
982 a re-entry event to South America. However, as mentioned above, it is not possible to  
983 constrain much more than that at this moment. In any case, the possibility of a Neogene re-  
984 entry event to South America by a xenartran is compatible with the fact that we know  
985 several of these events during the Pleistocene. Among these Pleistocene events, there are  
986 several involving xenartrants, including the pampatheriids *Holmesina* and *Pampatherium*,

987 the glyptodontid *Glyptotherium*, the pachyarmatheriid *Pachyarmatherium*, the dasypodid  
988 *Dasypus* and the megatheriine *Eremotherium* (Woodburne et al. 2006; Woodburne 2010  
989 and references therein).

990 Now let's discuss the evolutionary implications of this systematic analysis for the genus  
991 *Holmesina* and the multiple Interamerican dispersal events of pampatheriids, including that  
992 of *Scirrotherium* (discounting the non-confirmed re-entry event to South America). The  
993 genus *Holmesina* has its oldest record (*Holmesina* sp.) in sedimentary rocks deposited  
994 around the Pliocene-Pleistocene boundary (~2.4 mya) in La Florida, United States  
995 (Edmund 1987; Woodburne 2010 and references there; Gaudin & Lyon 2017). This  
996 northward dispersal event is part of the earliest phase of the GABI (GABI 1), in which  
997 additionally participated other xenartrans as *Dasypus*, *Pachyarmatherium* and  
998 *Eremotherium* (Woodburne 2010). Typically, *H. floridanus* has been considered the most  
999 basal among the *Holmesina* species (Edmund 1987), as it is supported here. The time-  
1000 calibrated phylogeny introduced in this work for Pampatheriidae (Fig. 12) suggests that  
1001 exist a long ghost lineage leading to *Holmesina*, from the Early Miocene (Burdigalian) until  
1002 the Late Pliocene. The improvement of the fossil record in northern South America, Central  
1003 America and Mexico will allow to advance in the recognition of probable direct ancestral  
1004 forms for *Holmesina*.

1005 From the above analysis, a probable model of biogeographical evolution of *Holmesina* is as  
1006 follows (Fig. 13). A hypothetical pampatheriid close to *Holmesina* or even a hypothetical  
1007 *Holmesina* species basal with respect to *H. floridanus* dispersed to Central America,  
1008 Mexico and United States during the Pliocene (Early Pliocene according the time-calibrated  
1009 phylogeny). Once it was established the genus *Holmesina* in North America with *H.*

1010 *floridanus*, the larger species *H. septentrionalis* diverged and differentiated in the Early  
1011 Pleistocene of southern United States. Later, *H. septentrionalis* expanded southward to  
1012 Mexico and Central America during the Early-Middle Pleistocene (Aguilar & Laurito  
1013 2009). In the Middle or early Late Pleistocene, possibly *H. septentrionalis* colonized South  
1014 America, where took place an important diversification, which was likely influenced by the  
1015 Late Pleistocene climatic changes (Scillato-Yané et al. 2005). This diversification gave  
1016 origin to the species *H. occidentalis*, *H. rondoniensis*, *H. major* and to the most robust  
1017 pampatheriid, *H. paulacoutoi* (Scillato-Yané et al. 2005).

1018 As inferred from the phylogeny and derived interpretations here presented, the dispersal  
1019 events of *S. antelucanus* and *H. floridanus* to North America are independent of each other.  
1020 This means that the number of northward intercontinental dispersal events of pampatheriids  
1021 during the late Cenozoic actually is at least three, which in chronological order are: (1)  
1022 genus *Scirrotherium* (Late Miocene); (2) lineage *Plaina-Pampatherium* (Early Pliocene);  
1023 (3) genus *Holmesina* (undetermined Pliocene). From these events, only the latter, based on  
1024 the fossil record of *H. floridanus*, is included in the GABI. The remaining two events are  
1025 classified as part of the macroevolutionary invasion “wastebasket” called “Pre-GABI”  
1026 (literally, ‘before the GABI’; Woodburne et al. 2006; Woodburne 2010; also named by  
1027 Cione et al. 2015 as “ProtoGABI”). In the lineage *Plaina-Pampatherium*, it was  
1028 differentiated one genus, *Pampatherium*, and at least three species (*P. mexicanum*, *P. typum*  
1029 and *P. humboldtii*, being the two latter recorded in South America). Meanwhile, the  
1030 northward dispersal event of *Scirrotherium* seems to give no origin to any other species  
1031 different to *S. antelucanus*. Only a confirmed southward intercontinental dispersal event of  
1032 the *Scirrotherium-Kraglievichia-Holmesina* clade has been well-established, i.e. that of

1033 *Holmesina* to South America in the Middle or early Late Pleistocene (Aguilar & Laurito  
1034 2009). This event probably is not part of any of the GABI phases of Woodburne (2010) but  
1035 it is chronologically located between the GABI 2 and 3.

1036 As it has been shown, the study of more abundant and complete pampatheriid material  
1037 preserved in Neogene geological units of northern South America, in particular, and the  
1038 current intertropical region of the Americas, in general, has the potential of provide us more  
1039 complex and interesting scenarios on the evolution of this glyptodontoid family and,  
1040 specifically, the genera *Scirrotherium* and *Holmesina*.

1041

## 1042 **CONCLUSION**

1043 The monophyly of *Scirrotherium* has been tested through parsimony phylogenetic analyses.  
1044 This taxon is recovered as paraphyletic if we include all the referred species, i.e. *S.*  
1045 *hondaensis*, *S. antelucanus* and ‘*S.*’ *carinatum*. The latter species is closer to *Kraglievichia*  
1046 *paranensis* and, therefore, here it is proposed the new name *K. carinatum* comb. nov. The  
1047 remaining referred species to *Scirrotherium*, *S. hondaensis* and *S. antelucanus*, are designed  
1048 in aphyly. The taxonomic validity of *Scirrotherium*, as defined here, is maintained from  
1049 diagnostic evidence. The genus *Scirrotherium* is probably the sister taxon of *Kraglievichia*,  
1050 and these two genera form the sister clade of *Holmesina*. The genus *Scirrotherium* has  
1051 occurrence from the late Early Miocene to Late Pliocene of northwestern South America  
1052 (Colombia, Venezuela and northern Peru) and the Late Miocene of southern Central  
1053 America (Costa Rica). A geographical origin of Pampatheriidae in northernmost South  
1054 America is suggested from the fossil record of *Scirrotherium* and a new time-calibrated

1055 phylogeny. The genus *Scirrotherium* also represents the earliest member of Pampatheriidae  
1056 which participated in a dispersal event to North America, specifically to the ancient Central  
1057 American peninsula. This dispersal event happened when the PLB was not fully formed  
1058 yet. The species *S. antelucanus* lived in Central America and now also in northern  
1059 Colombia during the late Neogene. This is the first Interamerican biogeographical  
1060 correlation of a Neogene land mammal with high taxonomical resolution, i.e. at the species  
1061 level. The record of *S. antelucanus* in both sides of the ancient Central American Seaway is  
1062 compatible with a possible re-entry event of this pampatheriid to South America. In  
1063 addition, *Scirrotherium* is not probably the South American ancestor of the originally-  
1064 endemic North American genus *Holmesina*. In contrast with a previous hypothesis which  
1065 argues that *Holmesina* may have evolved from *Kraglievichia*, here it is suggested that there  
1066 is no evidence of direct ancestral forms of *Holmesina*, although the unknown South  
1067 American ancestor of *Holmesina* may be morphologically more similar to *Scirrotherium*.

1068

## 1069 **Acknowledgements**

1070 I am greatly indebted to all curators and managers of the collections visited for revision of  
1071 specimens during this work, especially to: Andrés Vanegas (Museo de Historia Natural La  
1072 Tatacoa), Aldo Rincón (Museo Mapuka, Universidad del Norte), Jorge Moreno-Bernal  
1073 (Museo Mapuka, Universidad del Norte), Carlos De Gracia (Museo Mapuka, Universidad  
1074 del Norte), Richard C. Hulbert Jr. (Florida Museum of Natural History), Kenneth  
1075 Angielczyk (Field Museum of Natural History), Bill Simpson (Field Museum of Natural  
1076 History, Patricia Holroyd (University of California Museum of Paleontology) and Marcelo  
1077 Reguero (Museo de La Plata). I am also grateful to Carlos Jaramillo (Smithsonian Tropical



1078 Research Institute) and his field work team from allowing access to fossils they collected in  
1079 the Department of La Guajira (Colombia). Likewise, special thanks to the professor Antonio  
1080 Tovar (University of Sucre) by inspiration to explore the Sincelejo Formation; to my field  
1081 assistants during this exploration in the Department of Sucre (Colombia), Oscar Melendrez,  
1082 Angel Cruz and Juan Pacheco. I would like to thank professor César Laurito (Instituto  
1083 Nacional de Aprendizaje de Costa Rica) and Edwin Cadena (Universidad del Rosario) for  
1084 providing photos of osteoderms of the species *S. antelucanus* and one photo of outcrops of  
1085 the Castilletes Formation, respectively. This work would not have been possible without  
1086 logistic support and encourage by Alba Lara, Carolay Jiménez and Mónica Montalvo. An  
1087 anonymous reviewer provided comments that made it possible to improve the manuscript.  
1088 Financial assistance for this project was provided by several institutions/agencies:  
1089 CONICET (Internal Doctoral Fellowship); Field Museum of Natural History (Science  
1090 Visiting Scholarship); Florida Museum of Natural History (International Travel Grant);  
1091 University of California Museum of Paleontology (Welles Fund); and The Paleontological  
1092 Society (PalSIRP-Sepkoski Grant).

1093

#### 1094 DATA ARCHIVING STATEMENT

1095 Data for this study are available in the Dryad Digital Repository: [Intentionally blank]

1096 The nomenclatural acts contained in this work are registered in ZooBank:

1097 *LSID*. urn:lsid:zoobank.org:act:313358B5-3B1F-4902-8C2E-BB07CFCBEE18

1098 *LSID*. urn:lsid:zoobank.org:act:E3B83181-91D6-44C8-90C0-BBAACEC2CDEE

1099 *LSID*. urn:lsid:zoobank.org:act:225CD304-3B63-4B55-B8B8-33B46C90A194

1100 *LSID*. urn:lsid:zoobank.org:act:92C8B169-4F79-467E-B951-EF1DE6E327B1

1101

1102 REFERENCES

1103 AGUILAR, D. H. and LAURITO, C. A. 2009. El armadillo gigante (Mammalia, Xenarthra,  
1104 Pamphathiidae) del río Tomayate, Blancano tardío-Irvingtoniano temprano, El  
1105 Salvador, América Central. *Revista Geológica de América Central*, **41**, 25–36.

1106 AGUILAR, T., ACEVEDO, B. and ULLOA, A. 2010. Paleontología de una sección del río  
1107 Corredores, Formación Curré, Mioceno, Costa Rica. *Revista Geológica de América*  
1108 *Central*, **42**: 43–75.

1109 ALFARO, E. and HOLZ, M. 2014. Review of the chronostratigraphic charts in the Sinú-  
1110 San Jacinto Basin based on new seismic stratigraphic interpretations. *Journal of South*  
1111 *American Earth Sciences*, **56**, 139–169.

1112 ALVARO, G. E., BARQUERO, R., TAYLOR, W., LÓPEZ, A. CERDAS, A. and  
1113 MURILLO, J. 2009. Geología de la hoja general, Costa Rica. *Revista Geológica de*  
1114 *América Central*, **40**: 97–107.

1115 AMEGHINO, F. 1888. Lista de las especies de mamíferos fósiles del Mioceno superior de  
1116 Monte Hermoso hasta ahora conocidas. *Obras Completas y Correspondencia Científica*,  
1117 **5**, 481–496.

1118 ANDERSON, V. J., HORTON, B. K., SAYLOR, J. E., MORA, A., TESÓN, E.,  
1119 BREECKER, D. O. and KETCHAM, R. A. 2016. Andean topographic growth and

- 1120 basement uplift in southern Colombia: Implications for the evolution of the Magdalena,  
1121 Orinoco, and Amazon river systems. *Geosphere*, **12** (4), 1235–1256.
- 1122 ANTOINE, P. O., ABELLO, M. A., ADNET, S., SIERRA, A. J., BABY, P., BILLET, G.,  
1123 BOIVIN, M., CALDERON, Y., CANDELA, M. A., CHABAIN, J., CORFU, F.,  
1124 CROFT, D. D., GANERØD, M., JARAMILLO, C., KLAUS, S., MARIVAUX, L.,  
1125 NAVARRETE, R. E., ORLIAC, M. J. and PARRA, F. 2016. A 60-million-year  
1126 Cenozoic history of western Amazonian ecosystems in Contamana, eastern Peru.  
1127 *Gondwana Research*, **31**, 30–59.
- 1128 AUSICH, W. I., KAMMER, T. W., RHENBERG, E. C. and WRIGHT, D. F. 2015. Early  
1129 phylogeny of crinoids within the pelmatozoan clade. *Palaeontology*, **58** (6): 937–952.
- 1130 BEARD, K. C. and DAWSON, M. R. 1999. Intercontinental dispersal of Holarctic land  
1131 mammals near the Paleocene/Eocene boundary; paleogeographical, paleoclimatic and  
1132 biostratigraphic implications. *Bulletin de la Société géologique de France*, **170** (5), 697–  
1133 706.
- 1134 BENGTON, P. 1988. Open nomenclature. *Palaeontology*, **31** (1), 223–227.
- 1135 BERMÚDEZ, H. D., ALVARÁN, M., GRAJALES, J. A., RESTREPO, L. C., ROSERO, J.  
1136 S., GUZMÁN, C., RUÍZ, E. C., NAVARRETE, R. E., JARAMILLO, C. and OSORNO,  
1137 J. F., 2009. Estratigrafía y evolución geológica de la secuencia sedimentaria del  
1138 Cinturón Plegado de San Jacinto. *Memorias XII Congreso Colombiano de Geología*, pp.  
1139 1–27.
- 1140 BERNAL-OLAYA, R., MANN, P. and VARGAS, C. A. 2015. Earthquake, tomographic,  
1141 seismic reflection, and gravity evidence for a shallowly dipping subduction zone beneath

- 1142 the Caribbean Margin of Northwestern Colombia. In BARTOLINI, C. and MANN, P.  
1143 (eds.) *Petroleum Geology and Potential of the Colombian Caribbean Margin*. AAPG  
1144 *Memoir*, **118**, 247–270.
- 1145 BILLET, G., HAUTIER, L., DE MUIZON, C. and VALENTIN, X. 2011. Oldest cingulate  
1146 skulls provide congruence between morphological and molecular scenarios of armadillo  
1147 evolution. *Proceedings of the Royal Society of London B, Biological Sciences*, **278**,  
1148 2791–2797.
- 1149 BLOCH, J. I., WOODRUFF, E. D., WOOD, A. R., RINCON, A. F., HARRINGTON, A.  
1150 R., MORGAN, G. S., FOSTER, D. A., MONTES, C., JARAMILLO, C. A., JUD, N. A.,  
1151 JONES, D. S. and MACFADDEN, B. J. 2016. First North American fossil monkey and  
1152 early Miocene tropical biotic interchange. *Nature*, **533** (7602), 243–258.
- 1153 BOWEN, G. J., CLYDE, W. C., KOCH, P. L., TING, S., ALROY, J., TSUBAMOTO, T.,  
1154 WANG, Y. and WANG, Y. 2002. Mammalian dispersal at the Paleocene/Eocene  
1155 boundary. *Science*, **295** (5562), 2062–2065.
- 1156 BRANDONI, D., RUIZ, L. G. and BUCHER, J. 2019. Evolutive Implications of  
1157 *Megathericulus patagonicus* (Xenarthra, Megatheriinae) from the Miocene of Patagonia  
1158 Argentina. *Journal of Mammalian Evolution*, 1–16.
- 1159 CARLINI, A. A., ZURITA, A. E., SCILLATO-YANÉ, G. J., SÁNCHEZ, R. and  
1160 AGUILERA, O. A. 2008. New Glyptodont from the Codore Formation (Pliocene),  
1161 Falcón State, Venezuela, its relationship with the *Asterostemma* problem, and the  
1162 paleobiogeography of the Glyptodontinae. *Paläontologische Zeitschrift*, **82** (2), 139–  
1163 152.

- 1164 CARRILLO, J. D., FORASIEPI, A., JARAMILLO, C. and SÁNCHEZ-VILLAGRA, M. R.  
1165 2015. Neotropical mammal diversity and the Great American Biotic Interchange: spatial  
1166 and temporal variation in South America's fossil record. *Frontiers in Genetics*, **5**, 451,  
1167 1–11
- 1168 CARRILLO-BRICEÑO, J. D., REYES-CESPEDES, A. E., SALAS-GISMONDI, R. and  
1169 SÁNCHEZ, R. 2018. A new vertebrate continental assemblage from the Tortonian of  
1170 Venezuela. *Swiss Journal of Palaeontology*, 1–12.
- 1171 CARTELLE, C. and BOHÓRQUEZ, G.A. 1985. *Pamphotherium paulacoutoi*, uma nova  
1172 espécie de tatu gigante da Bahia, Brasil (Edentata, Dasypodidae). *Revista Brasileira de*  
1173 *Zoologia*, **2**: 229-254.
- 1174 — and DE IULIIS, G. 1995. *Eremotherium laurillardi*: The Panamerican late Pleistocene  
1175 megatheriid sloth. *Journal of Vertebrate Paleontology*, **15** (4), 830–841.
- 1176 — — 2006. *Eremotherium laurillardi* (Lund) (Xenarthra, Megatheriidae), the Panamerican  
1177 giant ground sloth: Taxonomic aspects of the ontogeny of skull and dentition. *Journal of*  
1178 *Systematic Palaeontology*, **4** (2), 199–209.
- 1179 — — and PUJOS, F. 2015. *Eremotherium laurillardi* (Lund, 1842) (Xenarthra,  
1180 Megatheriinae) is the only valid megatheriine sloth species in the Pleistocene of  
1181 intertropical Brazil: A response to Faure et al., 2014. *Comptes Rendus Palevol*, **14** (1),  
1182 15–23.

- 1183 CASTELLANOS, A. 1937. Anotaciones sobre la línea filogenética de clamiterios. *Serie*  
1184 *Técnico-Científica de la Facultad de Ciencias Matemáticas, Físico-Químicas y*  
1185 *Naturales*, **8**:1–35. Rosario, Argentina.
- 1186 CIONE, A., GASPARINI, G., SOIBELZON, E., SOIBELZON, L. and TONNI, E. 2015.  
1187 *The Great American Biotic Interchange. A South American perspective*. Springer Briefs  
1188 in Earth System Sciences. South America and the Southern Hemisphere, Amsterdam,  
1189 Netherlands, 97 pp.
- 1190 COATES, A. G. and STALLARD, R. F. 2013. How old is the Isthmus of Panama? *Bulletin*  
1191 *of Marine Science*, **89** (4), 801–813.
- 1192 CORTES, J. E., AGUILERA, R., WILCHES, O., OSORNO, J. F. and CORTES, S. I. 2018.  
1193 Organic geochemical insights from oil seeps, tars, rocks, and mud volcanoes on the  
1194 petroleum systems of the Sinú-San Jacinto basin, Northwestern Colombia. *Journal of*  
1195 *South American Earth Sciences*, **86**, 318–341.
- 1196 COZZUOL, M. A., 2006. The Acre vertebrate fauna: age, diversity, and geography.  
1197 *Journal of South American Earth Sciences*, **21**, 185–203.
- 1198 CROFT, D. A. 2007. The Middle Miocene (Laventan) Quebrada Honda fauna, southern  
1199 Bolivia and a description of its notoungulates. *Palaeontology*, **50** (1), 277–303.
- 1200 DE IULIIS, G. and EDMUND, A. G. 2002. *Vassallia maxima* Castellanos, 1946  
1201 (Mammalia: Xenarthra: Pamphathiidae), from Puerta del Corral Quemado (late  
1202 Miocene to early Pliocene), Catamarca Province, Argentina. *Smithsonian Contributions*  
1203 *to Paleobiology*, **93**, 49–64.

- 1204 DELSUC, F., SUPERINA, M., TILAK, M. K., DOUZERY, E. J. and HASSANIN, A.  
1205 2012. Molecular phylogenetics unveils the ancient evolutionary origins of the enigmatic  
1206 fairy armadillos. *Molecular Phylogenetics and Evolution*, **62**, 673–680.
- 1207 EBACH, M. C. and Williams, D. M. 2010. Aphyly: a systematic designation for a  
1208 taxonomic problem. *Evolutionary biology*, **37** (2-3), 123–127.
- 1209 EDMUND, A. G. 1985. The Armor of fossil giant Armadillos (Pampatheriidae,  
1210 Xenarthra, Mammalia). Texas Memorial Museum, *Pearce-Sellards-Series*, **40**, 1–20.
- 1211 — 1987. Evolution of the Genus *Holmesina* (Pampatheriidae, Mammalia) in Florida, with  
1212 Remarks on Taxonomy and Distribution. Texas Memorial Museum, *Pearce-Sellards-*  
1213 *Series*, **45**, 1–20.
- 1214 — and THEODOR, J. 1997. A new giant Armadillo. In KAY, R. F., CIFELLI, R. L.,  
1215 FLYNN, J. J., and MADDEN, R. (eds.), *Vertebrate Paleontology of the Miocene Fauna*  
1216 *of La Venta, Colombia*. Smithsonian Institution Press, Washington, pp. 227–232
- 1217 FERNÍCOLA, J. C. 2008. Nuevos aportes para la sistemática de los Glyptodontia  
1218 Ameghino 1889 (Mammalia, Xenarthra, Cingulata). *Ameghiniana*, **45** (3), 553–574.
- 1219 FLINCH, J. F. 2003. Structural evolution of the Sinú-Lower Magdalena area (northern  
1220 Colombia). In BARTOLINI, C., BUFFLER, R. T. and BLICKWEDE, J. (eds.), *The*  
1221 *Circum-Gulf of Mexico and the Caribbean: Hydrocarbon Habitats, Basin Formation,*  
1222 *and Plate Tectonics*, *AAPG Memoir*, **79**, 776–796.
- 1223 FLYNN J. J., GUERRERO J. and SWISHER, C. C. III. 1997. Geochronology of the Honda  
1224 Group. In KAY, R. F., CIFELLI, R. L., FLYNN, J. J., and MADDEN, R. (eds.),

- 1225 *Vertebrate Paleontology of the Miocene Fauna of La Venta, Colombia*. Smithsonian  
1226 Institution Press, Washington, pp. 44–59.
- 1227 GAUDIN, T. J. 2004. Phylogenetic relationships among sloths (Mammalia, Xenarthra,  
1228 Tardigrada): the craniodental evidence. *Zoological Journal of the Linnean Society*, **140**,  
1229 255–305.
- 1230 — and WIBLE, J. R. 2006. The phylogeny of living and extinct armadillos (Mammalia,  
1231 Xenarthra, Cingulata): a craniodental analysis. In CARRANO, M. T., GAUDIN, T. J.,  
1232 BLOB, R. W. and WIBLE, J. R. (eds.), *Amniote Paleobiology: Perspectives on the*  
1233 *Evolution of Mammals, Birds and Reptiles*, University of Chicago Press, Chicago, pp.  
1234 153–198.
- 1235 — and LYON, L. M. 2017. Cranial osteology of the pampathere *Holmesina floridanus*  
1236 (Xenarthra: Cingulata; Blancan NALMA), including a description of an isolated petrosal  
1237 bone. *PeerJ*, **5**, e4022.
- 1238 GÓIS, F. 2005. Estudo descritivo e geométrico dos Cingulata (Mammalia, Xenarthra) do  
1239 Neógeno e Quaternário da Amazônia Sul-Occidental. Unpublished bachelor thesis,  
1240 Universidade Federal de Rondônia, 58 pp.
- 1241 — 2013. Análisis morfológico y afinidades de los Pampatheriidae (Mammalia, Xenarthra).  
1242 Unpublished PhD thesis, Universidad Nacional de La Plata, La Plata, Argentina, 330 pp.
- 1243 — SCILLATO-YANÉ, G. J., CARLINI, A. A. and UBILLA, M. 2012. Una nueva especie  
1244 de *Holmesina* Simpson (Xenarthra, Cingulata, Pampatheriidae) del Pleistoceno de  
1245 Rondônia, sudoeste de la amazonia, Brasil. *Revista Brasileira de Paleontologia*, **15** (2),  
1246 211–227.



- 1247 — SCILLATO-YANÉ, G. J., CARLINI, A. A. and GUILHERME, E. 2013. A new species  
1248 of *Scirrotherium* Edmund & Theodor, 1997 (Xenarthra, Cingulata, Pamphathiidae)  
1249 from the late Miocene of South America. *Alcheringa: An Australasian Journal of*  
1250 *Palaeontology*, **37** (2), 177–188.
- 1251 — RUIZ, L. R., SCILLATO-YANÉ, G. J. and SOIBELZON, E. 2015. A peculiar new  
1252 Pamphathiidae (Mammalia: Xenarthra: Cingulata) from the Pleistocene of Argentina  
1253 and comments on Pamphathiidae diversity. *PloS One*, **10** (6), e0128296.
- 1254 — NASCIMENTO, E. R., PORTO, A. S., HOLANDA, E. C. and COZZUOL, M. A. 2004.  
1255 Ocorrências de Cingulata dos gêneros *Kraglievichia* e *Holmesina* do Terciário e  
1256 Quaternário da Amazônia Sul-Occidental. *Ameghiniana*, **49**, 41.
- 1257 GUERRERO, J. 1997. Stratigraphy and sedimentary environments of the Honda Group in  
1258 the La Venta area. Miocene uplift of the Colombian Andes. In KAY, R. F., CIFELLI, R.  
1259 L., FLYNN, J. J., and MADDEN, R. (eds.), *Vertebrate Paleontology of the Miocene*  
1260 *Fauna of La Venta, Colombia*. Smithsonian Institution Press, Washington, pp. 15–43.
- 1261 GOLOBOFF, P. A. 2014. Extended implied weighting. *Cladistics*, **30** (3): 260–272.
- 1262 — TORRES, A. & ARIAS, J. S. 2018. Weighted parsimony outperforms other methods of  
1263 phylogenetic inference under models appropriate for morphology. *Cladistics*, **34** (4):  
1264 407–437.
- 1265 — CARPENTER, J. M., SALVADOR ARIAS, J. and MIRANDA ESQUIVEL, D. R.  
1266 2008. Weighting against homoplasy improves phylogenetic analysis of morphological  
1267 data sets. *Cladistics*, **24** (5): 758–773.

- 1268 HOFFSTETTER, R. 1952. Les mammifères pleistocenes de la République de l'Équateur.  
1269 *Mémoires Société Géologique de France*, **66**: 1–391.
- 1270 JARAMILLO, C. 2018. Evolution of the Isthmus of Panama: biological,  
1271 paleoceanographic, and paleoclimatological implications. In HOORN, C. and  
1272 ANTONELLI, A. (eds.), *Mountains, climate and biodiversity*. John Wiley & Sons,  
1273 Oxford, pp. 323–338
- 1274 — ROMERO, I., D'APOLITO, C., BAYONA, G., DUARTE, E., LOUWYE, S.,  
1275 ESCOBAR, J., LUQUE, J., CARRILLO-BRICEÑO, J. D., ZAPATA, V., MORA, A.,  
1276 SCHOUTEN, S., ZAVADA, M., HARRINGTON, G. and WESSELING, F. P. 2017.  
1277 Miocene flooding events of western Amazonia. *Science advances*, **3** (5), e1601693.
- 1278 KERBER, L., NEGRI, F. R., RIBEIRO, A. M., NASIF, N., SOUZA-FILHO, J. P. and  
1279 FERIGOLO, J. 2017. Tropical fossil caviomorph rodents from the southwestern  
1280 Brazilian Amazonia in the context of the South American faunas: systematics,  
1281 biochronology, and paleobiogeography. *Journal of Mammalian Evolution*, **24** (1), 57–  
1282 70.
- 1283 KOLARSKY, R. A., MANN, P. and MONTERO, W. 1995. Island arc response to shallow  
1284 subduction of the Cocos Ridge, Costa Rica. *Special papers of the Geological Society of*  
1285 *America*, **295**: 235–262.
- 1286 LATRUBESSE, E. M., COZZUOL, M. A., SILVA-CAMINHA, S. A., RIGSBY, C. A.,  
1287 ABSY, M. L. and JARAMILLO, C., 2010. The late Miocene paleogeography of the  
1288 Amazon Basin and the evolution of the Amazon River system. *Earth-Science Reviews*,  
1289 **99**, 99–124.

- 1290 LAURITO, C. A. and VALERIO, A. L. 2013. *Scirrotherium antelucanus*, una nueva  
1291 especie de Pamphathiidae (Mammalia, Xenarthra, Cingulata) del Mioceno Superior de  
1292 Costa Rica, América Central. *Revista Geológica de América Central*, **49**, 45–62.
- 1293 LEIDY, J. 1889. Fossil Vertebrates from Florida. *Proceedings of the Academy of Natural  
1294 Sciences of Philadelphia*, **41**: 96-97.
- 1295 LOWERY, B. J. 1982. Sedimentology and tectonic implications of the Middle to Upper  
1296 Miocene Curré Formation. Unpublished M.S. thesis, Louisiana State University, Baton  
1297 Rouge, 100 pp.
- 1298 LUND, P. 1839. Blik paa Braziliens Dyreverden for Sidste Jordomvaeltning. Anden  
1299 Afhandling: Pattedyrene. *Det Kongelige Danske Videnskabernes  
1300 SelskabsNaturvidenskabelige og Mathematiske Afhandlinger*, **8**: 61-144.
- 1301 — 1842. Blik paa Braziliens Dyreverden for Sidste Jordomvaeltning. Tredie Afhandling:  
1302 Forsaettelse af Pattedyrene. *Det Kongelige Danske Videnskabernes  
1303 SelskabsNaturvidenskabelige og Mathematiske Afhandlinger*, **8**: 217–272.
- 1304 MACFADDEN, B. J. 2006. Extinct mammalian biodiversity of the ancient New World  
1305 tropics. *Trends in Ecology & Evolution*, **21** (3), 157–165.
- 1306 MADDISON, W. P. and MADDISON, D. R. 2010. Mesquite: a modular system for  
1307 evolutionary analysis. Version 2.73. [<http://mesquiteproject.org>]
- 1308 MARTINELLI, A. G., FERRAZ, P. F., CUNHA, G. C., CUNHA, I. C., DE SOUZA  
1309 CARVALHO, I., RIBEIRO, L. C. B., MACEDO NETO, F., LOURENCINI  
1310 CAVELLANI, C., ANTUNES TEIXEIRA, V. P. and DA FONSECA FERRAZ, M. L.

- 1311 2012. First record of *Eremotherium laurillardi* (Lund, 1842) (Mammalia, Xenarthra,  
1312 Megatheriidae) in the Quaternary of Uberaba, Triângulo Mineiro (Minas Gerais State),  
1313 Brazil. *Journal of South American Earth Sciences*, **37**, 202–207.
- 1314 MCDONALD, H. G. and LUNDELIUS, E. L., Jr. 2009. The giant ground sloth  
1315 *Eremotherium laurillardi* (Xenarthra, Megatheriidae) in Texas. In ALBRIGHT, L.B., III  
1316 (ed.), Museum of Northern Arizona, *Papers on geology, vertebrate paleontology, and*  
1317 *biostratigraphy in honor of Michael O. Woodburne*, Bulletin **65**, 407–421.
- 1318 MCKENNA, M.C. and BELL, S.K. 1997. *Classification of Mammals Above the Species*  
1319 *Level*. Columbia University Press, New York, 640 pp.
- 1320 MORENO, E. P. and MERCERAT, A. 1891. Exploración arqueológica de la provincia de  
1321 Catamarca: Paleontología. *Revista del Museo de La Plata*, **1**: 222-236.
- 1322 MORENO, F., HENDY, A. J. W., QUIROZ, L., HOYOS, N., JONES, D. S., ZAPATA, V.,  
1323 ZAPATA, S., BALLEEN, G. A., CADENA, E., CÁRDENAS, A. L., CARRILLO-  
1324 BRICEÑO, J. D., CARRILLO, J. D., DELGADO-SIERRA, D., ESCOBAR, J.,  
1325 MARTÍNEZ, J. I., MARTÍNEZ, C., MONTES, C., MORENO, J., PÉREZ, N.,  
1326 SÁNCHEZ, R., SUÁREZ, C., VALLEJO-PAREJA, M. C. and JARAMILLO, C. 2015.  
1327 Revised stratigraphy of Neogene strata in the Cocinetas basin, La Guajira, Colombia.  
1328 *Swiss Journal of Palaeontology*, **134** (1), 5–43.
- 1329 OBANDO, L. G. 2011. Stratigraphic and tectonic of northeast part of Dota quadrangle (1:  
1330 50,000), Costa Rica. *Revista Geológica de América Central*, **44**: 71–82.
- 1331 O'DEA, A., LESSIOS, H. A., COATES, A. G., EYTAN, R. I., RESTREPO-MORENO, S.  
1332 A., CIONE, A. L., COLLINS, L. S., DE QUEIROZ, A., FARRIS, D. W., NORRIS, R.

- 1333 D., STALLARD, R. F., WOODBURNE, M. O., AGUILERA, O., AUBRY, M-P.,  
1334 BERGGREN, W. A., BUDD, A. F., COZZUOL, M. A., COPPARD, S. E., DUQUE-  
1335 CARO, H., FINNEGAN, S., GASPARINI, G. M., GROSSMAN, E. L., JHONSON K.  
1336 G., LLOYD, D. K, KNOWLTON N., LEIGH E. G., LEONARD-PINGEL J. S.,  
1337 MARKO, P. B., PYENSON, N. D., RACHELLO-DOLMEN, P. G., SOIBELZON, E.,  
1338 SOIBELZON, L., TODD, J. A., VERMEIJ, G. J. and JACKSON, J. B. C. 2016.  
1339 Formation of the Isthmus of Panama. *Science advances*, **2** (8), e1600883.
- 1340 ORTIZ-JAUREGUIZAR, E. and CLADERA, G. A. 2006. Paleoenvironmental evolution of  
1341 southern South America during the Cenozoic. *Journal of Arid Environments*, **66** (3),  
1342 498–532.
- 1343 PATTERSON, B. and PASCUAL, R. 1968. The fossil mammal fauna of South America.  
1344 *The Quarterly Review of Biology*, **43** (4), 409–451.
- 1345 RIBEIRO, A. M., MADDEN, R. H., NEGRI, F. R., KERBER, L., HSIU, A. S. and  
1346 RODRIGUES, K. A. 2013. Mamíferos fósiles y biocronología en el suroeste de la  
1347 Amazonia, Brasil. In BRANDONI, D. and NORIEGA, J.I. (eds.), *El Neógeno de la*  
1348 *Mesopotamia argentina*, Asociación Paleontológica Argentina, Publicación Especial **14**,  
1349 207–221.
- 1350 RINCÓN, A. D., SOLÓRZANO, A., BENAMMI, M., VIGNAUD, P. and MCDONALD,  
1351 H. G. 2014. Chronology and geology of an Early Miocene mammalian assemblage in  
1352 North of South America, from Cerro La Cruz (Castillo Formation), Lara State,  
1353 Venezuela: Implications in the changing course of Orinoco River hypothesis. *Andean*  
1354 *geology*, **41** (3), 507–528.

- 1355 — — MACSOTAY, O., MCDONALD, H. G. and NÚÑEZ-FLORES, M. 2016. A new  
1356 Miocene vertebrate assemblage from the Río Yuca Formation (Venezuela) and the  
1357 northernmost record of typical Miocene mammals of high latitude (Patagonian) affinities  
1358 in South America. *GeoBios*, **49** (5), 395–405.
- 1359 RIVIER, F. 1985. Sección geológica del Pacífico al Atlántico a través de Costa Rica.  
1360 *Revista Geológica de América Central*, **2**: 22–32.
- 1361 ROBERTSON, J. S. 1976. Latest Pliocene mammals from Haile XV A, Alachua county,  
1362 Florida. *Bulletin of the Florida State Museum, Biological Sciences*, **20**: 111–186.
- 1363 SALAS-GISMONDI, R., FLYNN, J. J., BABY, P., TEJADA-LARA, J. V.,  
1364 WESSELINGH, F. P. and ANTOINE, P. O. 2015. A Miocene hyperdiverse crocodylian  
1365 community reveals peculiar trophic dynamics in proto-Amazonian mega-wetlands.  
1366 *Proceedings of the Royal Society B: Biological Sciences*, **282** (1804), 20142490.
- 1367 SÁNCHEZ-VILLAGRA, M. R. 2012. Embryos in Deep Time: The Rock Record  
1368 of Biological Development. University of California Press, Berkeley, California, 256 pp.
- 1369 SCHMIDT, D. N. 2007. The closure history of the Panama Isthmus: evidence from  
1370 isotopes and fossils to models and molecules. In WILLIAMS, M., HAYWOOD, A. M.,  
1371 GREGORY J., F. and SCHMIDT, D. N. (eds), *Deep time perspectives on climate*  
1372 *change – marrying the signal from computer models and biological proxies*. Geological  
1373 Society of London, London, pp. 427–442.
- 1374 SCILLATO-YANÉ, G. J., CARLINI, A. A., TONNI, E. P. and NORIEGA, J. I. 2005.  
1375 Paleobiogeography of the late Pleistocene pampatheres of South America. *Journal of*  
1376 *South American Earth Sciences*, **20** (1–2), 131–138.

- 1377 — GÓIS, F., ZURITA, A. E., CARLINI A. A., GONZÁLEZ RUIZ, L. R., KRMPOTIC, C.  
1378 M., OLIVA, C. and ZAMORANO, M. 2013. Los Cingulata (Mammalia, Xenarthra) del  
1379 “Conglomerado Osífero” (Mioceno tardío) de la Formación Ituzaingó de Entre Ríos,  
1380 Argentina. In BRANDONI, D. and NORIEGA, J.I. (eds.), *El Neógeno de la*  
1381 *Mesopotamia argentina*, Asociación Paleontológica Argentina, Publicación Especial **14**,  
1382 118–134.
- 1383 SIGOVINI, M., KEPPEL, E. and TAGLIAPIETRA, D. 2016. Open Nomenclature in the  
1384 biodiversity era. *Methods in Ecology and Evolution*, **7** (10), 1217–1225.
- 1385 SIMPSON, G. G. 1930. *Holmesina septentrionalis*, extinct giant armadillo of Florida.  
1386 *American Museum Novitates*, **442**: 1–10.
- 1387 SILVA, J. C., PARDO, A., CARDONA, A., BORRERO, C., FLORES, A., NAVARETTE,  
1388 R., MEJÍA, A., OCHOA, D., OSORIO, J. A., ROSERO, S. and ARENAS, A. 2012.  
1389 Multi-Chronological Proxies to Timing Early Oligocene and Middle Miocene  
1390 Deformation Events Along the Lower Magdalena Basin, NW Colombia. *Resúmenes del*  
1391 *XI Simposio Bolivariano-Exploración Petrolera en las Cuencas Subandinas*, Asociación  
1392 Colombiana de Geólogos y Geofísicos del Petróleo.  
1393 [<http://www.earthdoc.org/publication/publicationdetails/?publication=66175>]
- 1394 STIRTON, R. A. 1953. Vertebrate paleontology and continental stratigraphy in Colombia.  
1395 *Geological Society of America Bulletin*, **64** (6), 603–622.
- 1396 SWOFFORD, D. L. 2015. PAUP\*: Phylogenetic analysis using parsimony (and other  
1397 methods) (version 4.0a142).

- 1398 — and BELL, C. D. 2017. PAUP\* manual. Available at <http://phylosolutions.com/paup->  
1399 documentation/paupmanual.pdf.
- 1400 TITO, G. 2008. New remains of *Eremotherium laurillardi* (Lund, 1842) (Megatheriidae,  
1401 Xenarthra) from the coastal region of Ecuador. *Journal of South American Earth*  
1402 *Sciences*, **26** (4), 424–434.
- 1403 VILLARROEL, C. and CLAVIJO, J. 2005. Los mamíferos fósiles y las edades de las  
1404 sedimentitas continentales del Neógeno de la Costa Caribe Colombiana. *Revista de la*  
1405 *Academia Colombiana de Ciencias*, **29** (112), 345–356.
- 1406 VIZCAÍNO, S. F., DE IULIIS, G. and BARGO, M. S. 1998. Skull shape, masticatory  
1407 apparatus, and diet of *Vassallia* and *Holmesina* (Mammalia: Xenarthra:  
1408 Pamphathiidae): when anatomy constrains destiny. *Journal of Mammalian Evolution*, **5**  
1409 (4), 291–322.
- 1410 WEBB, S. D. 2006. The Great American Biotic Interchange: Patterns and Processes.  
1411 *Annals of the Missouri Botanical Garden*, **93** (2), 245–258.
- 1412 WOODBURN, M. O. 2010. The Great American Biotic Interchange: dispersals, tectonics,  
1413 climate, sea level and holding pens. *Journal of Mammalian Evolution*, **17** (4), 245–264.
- 1414 — and SWISHER, C. C. III. 1995. Land mammal high-resolution geochronology,  
1415 intercontinental overland dispersals, sea level, climate and vicariance. In BERGGREN,  
1416 W. A., KENT, D. W., AUBRY, M.-P. and HARDENBOL, J. (eds.), *Geochronology,*  
1417 *Time Scales and Global Stratigraphic Correlation*. *SEPM Special Publication*, **54**, 335-  
1418 364.



- 1419 — CIONE, A. L. and TONNI, E. P. 2006. Central American provincialism and the Great  
1420 American Biotic Interchange. Universidad Nacional Autónoma de México, Instituto de  
1421 Geología y Centro de Geociencias, *Publicación Especial*, **4**, 73–101.
- 1422 YUAN, P. B. 1984. Stratigraphy, sedimentology and geologic evolution of eastern Terraba  
1423 Trough, southwestern Costa Rica. Unpublished PhD thesis, Louisiana State University,  
1424 Baton Rouge, 110 pp.
- 1425 ZURITA, A. E., SCILLATO-YANÉ, G. J., CIANCIO, M., ZAMORANO, M. and  
1426 GONZÁLEZ-RUIZ, L. R. 2016. Los Glyptodontidae (Mammalia, Xenarthra): Historia  
1427 biogeográfica y evolutiva de un grupo particular de mamíferos acorazados.  
1428 *Contribuciones del MACN*, **6**, 249-262.

1429

## 1430 **FIGURE CAPTIONS**

1431 **Figure 1.** Geographical and stratigraphic provenance of the newly described material of  
1432 pampatheriids from the Neogene of Colombia. In the left upper corner, a map of  
1433 northwesternmost South America and the location of the regions of Colombia where there  
1434 are outcrops of the formations with pampatheriid specimens for this study. In the right  
1435 upper corner, photos of characteristic outcrops of these formations. Below in the center, a  
1436 general chronostratigraphic scheme with the position of each formation within the Neogene  
1437 and two important tectonic/palaeogeographical events in northwestern South America, i.e. a  
1438 major, underwater uplift of the Isthmus of Panama (Schmidt 2007) and the definitive  
1439 emergence of the Panama Land Bridge (O’dea et al. 2016). The photo of outcrops of the  
1440 Castilletes Formation was taken by Edwin Cadena.

1441 **Figure 2.** Phylogenetic results. A, strict consensus tree of the parsimony with equal  
1442 weights. Numbers below nodes are absolute Bremer support values. B, strict consensus tree  
1443 of the parsimony analysis with implied weights. C, majority-rule consensus tree of the  
1444 bootstrap resampling with implied weights. The numbers below nodes are bootstrap  
1445 support values. Note the difference in the phylogenetic position of *Holmesina floridanus* in  
1446 the two strict consensus trees. Explanation of this difference in the main text.

1447 **Figure 3.** Fixed and (semi) mobile osteoderms of *Scirrotherium hondaensis* from the La  
1448 Victoria and Villavieja Formations, Municipality of Villavieja, Department of Huila,  
1449 Colombia. A–B', fixed osteoderms; C'–K', (semi) mobile osteoderms. The osteoderms G,  
1450 J, K, L, W, X, Y, Z, A', B', G', I', J' and K' are associated with the catalog number VPPLT  
1451 348. The osteoderms H, U and V are associated with the catalog number VPPLT 004. The  
1452 osteoderms T and D' are associated with the catalog number VPPLT 701. All the former  
1453 osteoderms come from the lower and middle La Victoria Formation. The osteoderms B, C,  
1454 F, I, O, P, S, C' and F' are associated with the catalog number VPPLT 1683 - MT 18 and  
1455 come from the top of the La Victoria Formation. The osteoderms A, D, E, M, N, Q, R, E'  
1456 and H' are associated with the catalog number VPPLT 1683 - MT 18 and come from the  
1457 lower Villavieja Formation. Scale bar equal to 20 mm.

1458 **Figure 4.** Photos and anatomical line drawings of the skull VPPLT 706 of *Scirrotherium*  
1459 *hondaensis* from the middle La Victoria Formation, Municipality of Villavieja, Department  
1460 of Huila, Colombia. A–B, dorsal views; C–D, ventral views; E–F, right lateral views; D–H,  
1461 left lateral views. *Abbreviations:* aof, antorbital fossa; fr, frontals; iof, infraorbital foramen;  
1462 j, jugal; la, lacrimal; Mf1, first upper molariform; Mf9, ninth upper molariform; mx,

1463 maxilla; mxf, maxillary foramen; na, nasals; pal, palatines; pm, premaxilla. Scale bar equal  
1464 to 50 mm.

1465 **Figure 5.** Photos and anatomical line drawings of the left femur and right ulna VPPLT 706  
1466 of *Scirrotherium hondaensis* from the middle La Victoria Formation, Municipality of  
1467 Villavieja, Department of Huila, Colombia. The epiphyses of this femoral diaphysis have  
1468 been reconstructed from those with catalog number UCMP 39846. A–B, anterior views of  
1469 the femur; C–D, posterior views of the femur. E–F, medial views of the ulna; G–H, lateral  
1470 views of the ulna. *Abbreviations:* anc, fossa for the anconeus muscle; cp, coronoid process;  
1471 fh, femoral head; gt, greater trochanter; le, lateral epicondyle; me, medial epicondyle; op,  
1472 olecranon process; tn, trochlear notch; tt, third trochanter. Scale bar equal to 50 mm.

1473 **Figure 6.** Photos and anatomical line drawings of a thoracic vertebra (A–B) and several  
1474 anterior caudal vertebrae (C–F) VPPLT 706 of *Scirrotherium hondaensis* from the middle  
1475 La Victoria Formation, Municipality of Villavieja, Department of Huila, Colombia. A–B,  
1476 posterior views of the thoracic vertebra. C–D, lateral views of caudal vertebrae; E–F, dorsal  
1477 views of caudal vertebrae. *Abbreviations:* az, anterior zygapophyses; mp, metapophyses;  
1478 ns, neural spine; tp, transverse processes; vb, vertebral body; vla, ventrolateral apophyses.  
1479 Scale bar equal to 30 mm.

1480 **Figure 7.** Photos and anatomical line drawings of the astragalus (A–D) and calcaneum (E –  
1481 F) UCMP 39846 of *Scirrotherium hondaensis* from the lower (?) Villavieja Formation,  
1482 Municipality of Villavieja, Department of Huila, Colombia. A–B, astragalus in plantar  
1483 views; C–D, astragalus in dorsal views. E–F, calcaneum in dorsal views. *Abbreviations:* ct,  
1484 calcaneal tuber; ef, ectal facet; h, head of the astragalus; lt, lateral trochlea; mf, medial  
1485 trochlea; sf, sustentacular facet; st, *sulcus tali*. Scale bar equal to 20 mm.

1486 **Figure 8.** Fixed osteoderm MUN STRI 36880 of *Scirrotherium antelucanus* from the upper  
1487 Sincelejo Formation, Municipality of Los Palmitos, Department of Sucre, Colombia. Scale  
1488 bar equal to 20 mm.

1489 **Figure 9.** Osteoderms referred to aff. *Scirrotherium* (**A**, MUN STRI 16718; **E**, MUN STRI  
1490 38064; and **G**, MUN STRI 16719; all these specimens are from the Castilletes Formation  
1491 and they are fixed osteoderms except the latter, which consist of an anterior fragment of a  
1492 mobile osteoderm); *Scirrotherium* cf. *hondaensis* (**C**, MUN STRI 36814, a fixed osteoderm  
1493 from the Castilletes Formation); and *Scirrotherium* sp. (**B**, MUN STRI 36801; **D**, MUN  
1494 STRI 16158; and **F**, MUN STRI 34373; all these osteoderms are from the Castilletes  
1495 Formation, except the latter, which comes from the Ware Formation); Municipality of  
1496 Uribia, Department of La Guajira, Colombia. Note the two well-developed rows of anterior  
1497 foramina in the osteoderms MUN STRI 16718 and 38064. Scale bar equal to 20 mm.

1498 **Figure 10.** Osteoderms of *Kraglievichia carinatum* comb. nov. from the Ituzaingó  
1499 Formation, Entre Ríos Province, Argentina. The holotype of this species is marked with  
1500 one single asterisk (\*) and paratypes with double asterisk (\*\*). A–J, fixed osteoderms; K–  
1501 R, (semi) mobile osteoderms. **A**, MLP 69-IX-8-13AC\*\*; **B**, MLP 70-XII-29-1\*\*; **C**, MLP  
1502 41-XII-13-905; **D**, MLP 69-IX-8-13AF; **E**, MLP 69-IX-8-13AG; **F**, MLP 41-XII-13-414A;  
1503 **G**, MLP 69-IX-8-13AN; **H**, unknown catalog number; **I**, MLP 69-IX-8-13AK; **J**, MLP 41-  
1504 XII-13-414B; **K**, MLP 69-IX-8-13AS; **L**, MLP 69-IX-8-13AE\*\*; **M**, MLP 52-X-1-36; **N**,  
1505 MLP 69-IX-8-13AB\*; **O**, MLP 41-XII-13-909; **P**, MLP 69-IX-8-13AW; **Q**, MLP 69-IX-8-  
1506 13AQ; **R**, MLP 69-IX-8-13AY. Scale bar equal to 20 mm.

1507 **Figure 11.** One outstanding morphological difference between typical osteoderms of  
1508 *Scirrotherium* and *Kraglievichia*: Uniformly narrow LCE in fixed osteoderms of

1509 *Scirrotherium* (left; *S. hondaensis*); and anteriorly wide, posteriorly tapered LCE in the  
1510 same osteoderms of *Kraglievichia* (right; *K. carinatum* comb. nov.). Not to scale.

1511 **Figure 12.** Time-calibrated phylogeny of the clade *Scirrotherium* + *Kraglievichia* +  
1512 *Holmesina* based on the strict consensus cladogram from this work (Fig. 2). Polytomies  
1513 from the strict consensus tree (Fig. 2B) were resolved by (1) forcing the monophyly of *S.*  
1514 *hondaensis* and *S. antelucanus* and (2) placing the species *H. septentrionalis* and *H.*  
1515 *occidentalis* as successively basal to the largest South American *Holmesina* species, i.e. *H.*  
1516 *paulacoutoi* and *H. major*. Note the diversification events of the clade *Scirrotherium* +  
1517 *Kraglievichia* + *Holmesina* are mainly concentrated during the Burdigalian (late Early  
1518 Miocene) and Plio-Pleistocene. Likewise, note the relative long ghost lineage of  
1519 *Holmesina*. Images of the pampatheriids are from *PhyloPic* (all available under public  
1520 domain): top, *Pampatherium humboldtii* ([http://phylopic.org/name/670230e9-4775-493c-](http://phylopic.org/name/670230e9-4775-493c-b3ab-31718fb570a3)  
1521 [b3ab-31718fb570a3](http://phylopic.org/name/670230e9-4775-493c-b3ab-31718fb570a3)); below, *Holmesina floridanus* ([http://phylopic.org/name/73635941-](http://phylopic.org/name/73635941-ed8a-4518-aae8-70e824dbec97)  
1522 [ed8a-4518-aae8-70e824dbec97](http://phylopic.org/name/73635941-ed8a-4518-aae8-70e824dbec97)).

1523 **Figure 13.** Geographical distributions and intercontinental dispersal events of the clade  
1524 *Scirrotherium* + *Kraglievichia* + *Holmesina* during the Neogene-Pleistocene. The symbols  
1525 (i.e. squares, circles and triangles) should not necessarily be interpreted as single localities  
1526 but as approximate areas of occurrence. This is especially true for the Pliocene and  
1527 Pleistocene epochs.

1528

1529

1530

## TABLES

Table 1. Fixed (scapular and pelvic) osteodermal measurements for taxa of interest in this study.

| Taxon/Measurement              | Length    | Width     | Thickness | References                        |
|--------------------------------|-----------|-----------|-----------|-----------------------------------|
| <i>S. hondaensis</i>           | 16-35.2   | 17.5-27.9 | 3.7-6.9   | This work; Góis et al. 2013       |
| <i>S. antelucanus</i>          | 28.6-40.9 | 22-32.4   | 4.9-7.1   | This work; Laurito & Valerio 2013 |
| <i>K. carinatum</i> comb. nov. | 20.9-33.5 | 17-26.1   | 4.1-5.9   | This work; Góis et al. 2013       |
| <i>K. paranensis</i>           | 30-45     | 22.5-28.3 | 6-11      | Góis et al. 2013                  |
| <i>H. floridanus</i>           | 24.4-36.7 | 18.9-32.1 | 6-9.7     | This work; Edmund 1987            |

Table 2. Mobile and semi-mobile osteodermal measurements for taxa of interest in this study.

| Taxon/Measurement              | Length    | Width     | Thickness | References                  |
|--------------------------------|-----------|-----------|-----------|-----------------------------|
| <i>S. hondaensis</i>           | 29.4-60   | 17.9-27.4 | 4.9-7.3   | This work; Góis et al. 2013 |
| <i>S. antelucanus</i>          | 38.2-64.6 | 19.4-28.9 | -         | Laurito & Valerio 2013      |
| <i>K. carinatum</i> comb. nov. | 32-54.5   | 17-28.9   | 3.9-6     | This work; Góis et al. 2013 |
| <i>K. paranensis</i>           | 60.5-70.5 | 25-29     | 7-9       | Góis et al. 2013            |
| <i>H. floridanus</i>           | 61.8-71   | 17.6-28.5 | 4.7-6.3   | This work; Edmund 1987      |

Table 3. Selected cranial measurements for the specimen VPPLT 706 of *Scirrotherium hondaensis* and related taxa whose skulls are known.

| Taxon/Measurement         | GSL    | NL    | FL  | PAL  | LUR   | PL   | References          |
|---------------------------|--------|-------|-----|------|-------|------|---------------------|
| <i>S. hondaensis</i>      | 117.3* | ~52.8 | ~55 | -    | 84.1  | 94.3 | This work           |
| <i>K. cf. paranensis</i>  | 194    | 58    | 62  | 74   | -     | 159  | This work           |
| <i>H. floridanus</i> **   | 249    | 106.3 | 75  | 58.6 | 133.6 | 185  | This work           |
| <i>H. septentrionalis</i> | 290    | -     | -   | -    | 165   | 220  | Góis et al.<br>2012 |

\*Incomplete

\*\*Specimen UF 191448



Table 4. Femoral measurements for *Scirrotherium hondaensis* and related taxa whose femur is known.

| Measurement/Taxon         | GFL  | TTW  | DW   | References |
|---------------------------|------|------|------|------------|
| <i>S. hondaensis</i>      | 162* | 27.6 | 32.5 | This work  |
| <i>K. cf. paranensis</i>  | 164  | 33.7 | 38   | This work  |
| <i>H. floridanus</i> **   | 195  | 41   | 47   | This work  |
| <i>H. septentrionalis</i> | 290  | 70   | 86   | Góis 2013  |

\*Estimated from the specimens VPPLT 706 and UCMP 39846

\*\*Specimen UF 24918

# Figure 1

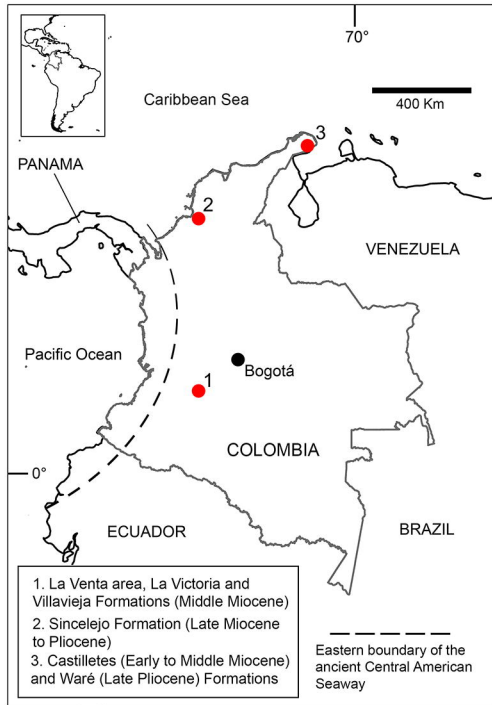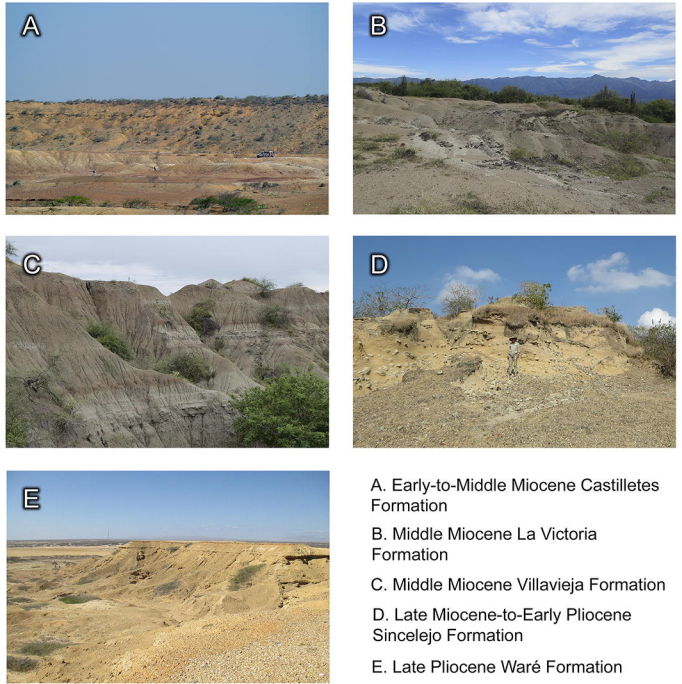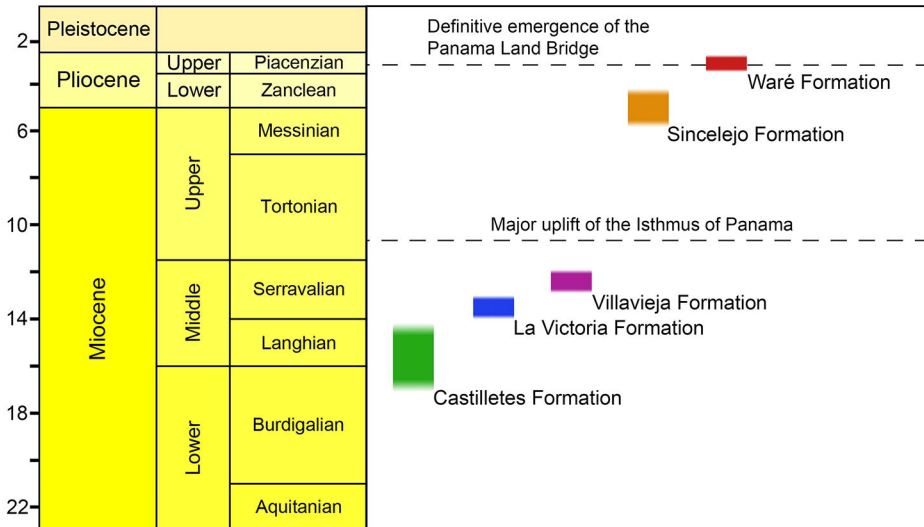

Figure 2

A

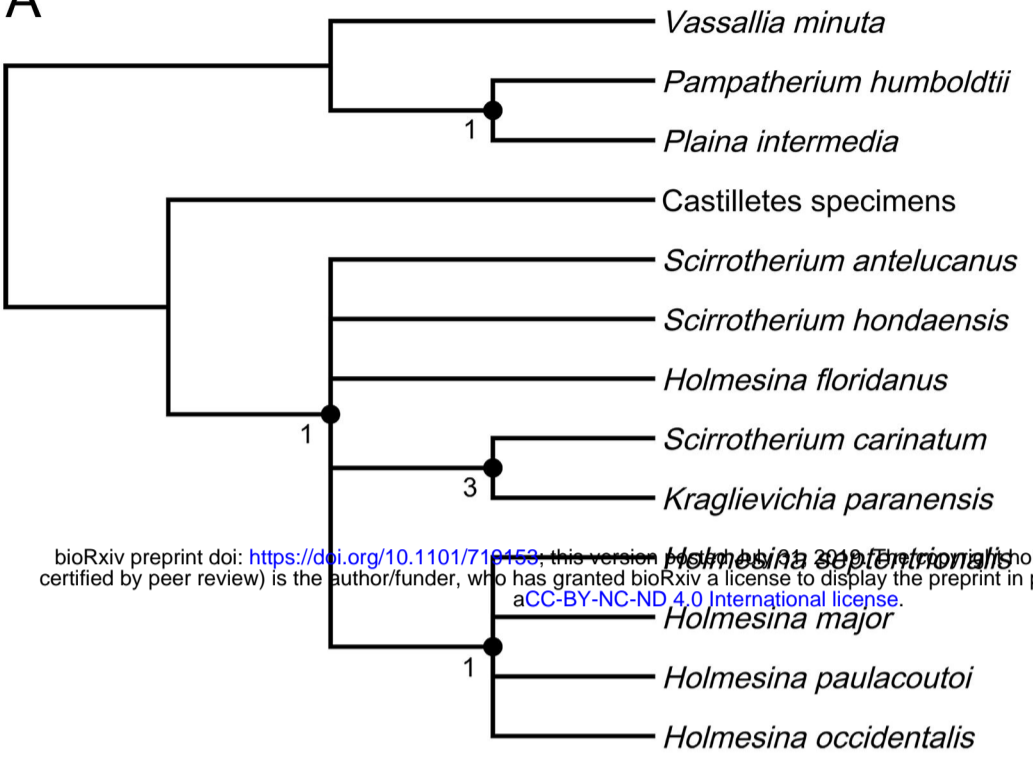

B

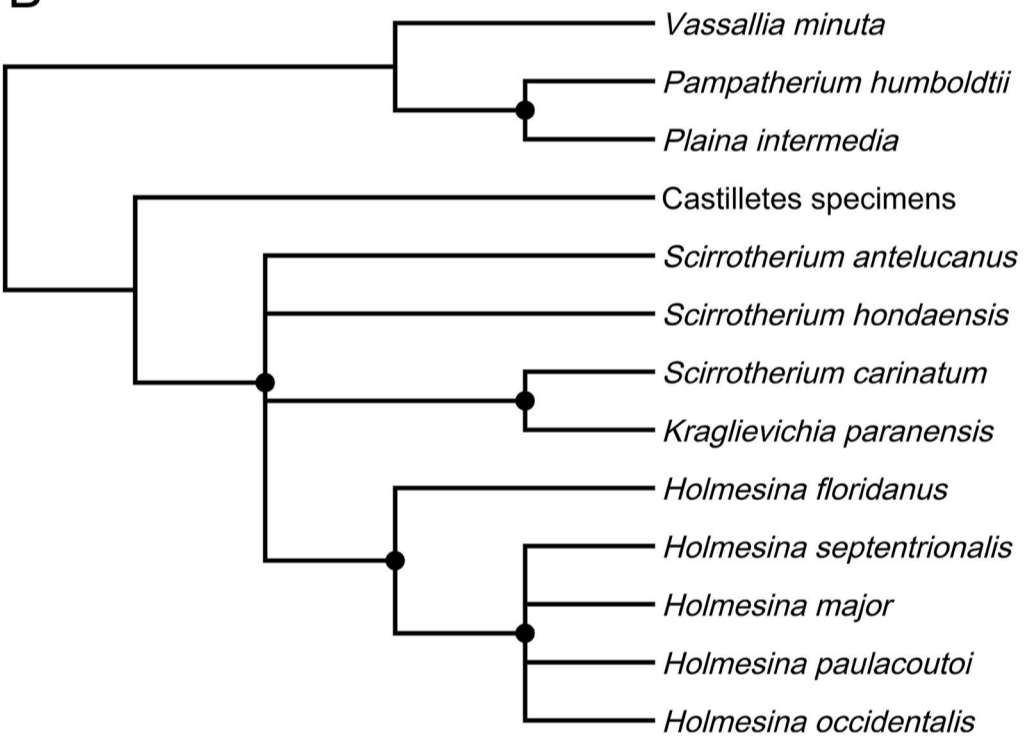

C

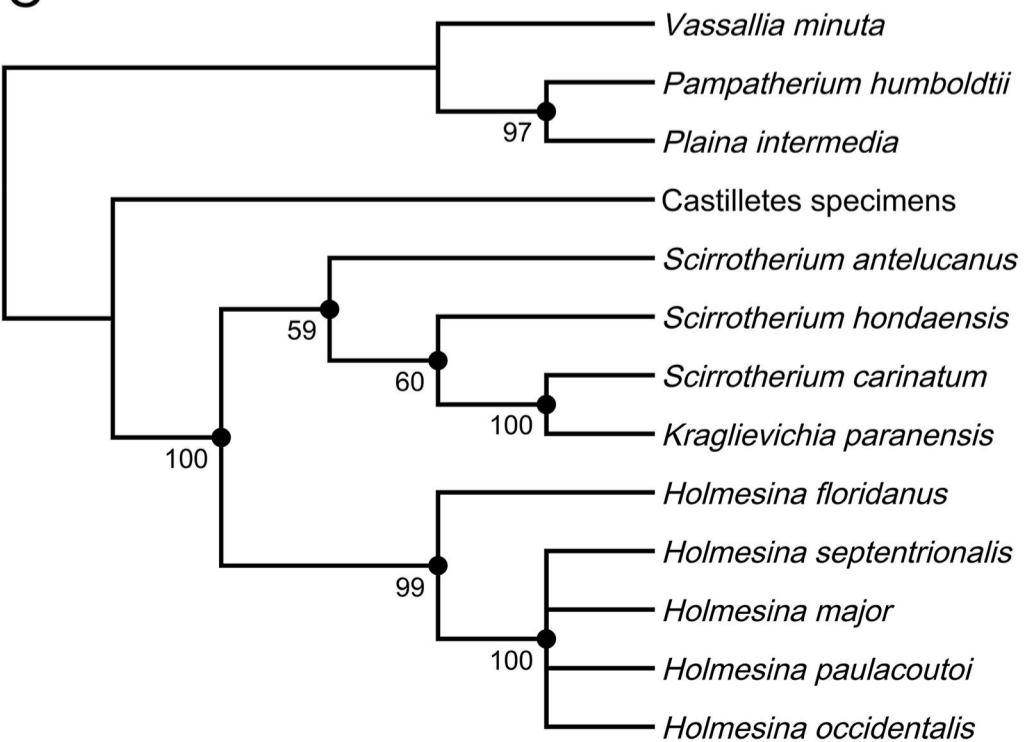

Figure 3

bioRxiv preprint doi: <https://doi.org/10.1101/719153>; this version posted July 31, 2019. The copyright holder for this preprint (which was not certified by peer review) is the author/funder, who has granted bioRxiv a license to display the preprint in perpetuity. It is made available under aCC-BY-NC-ND 4.0 International license.

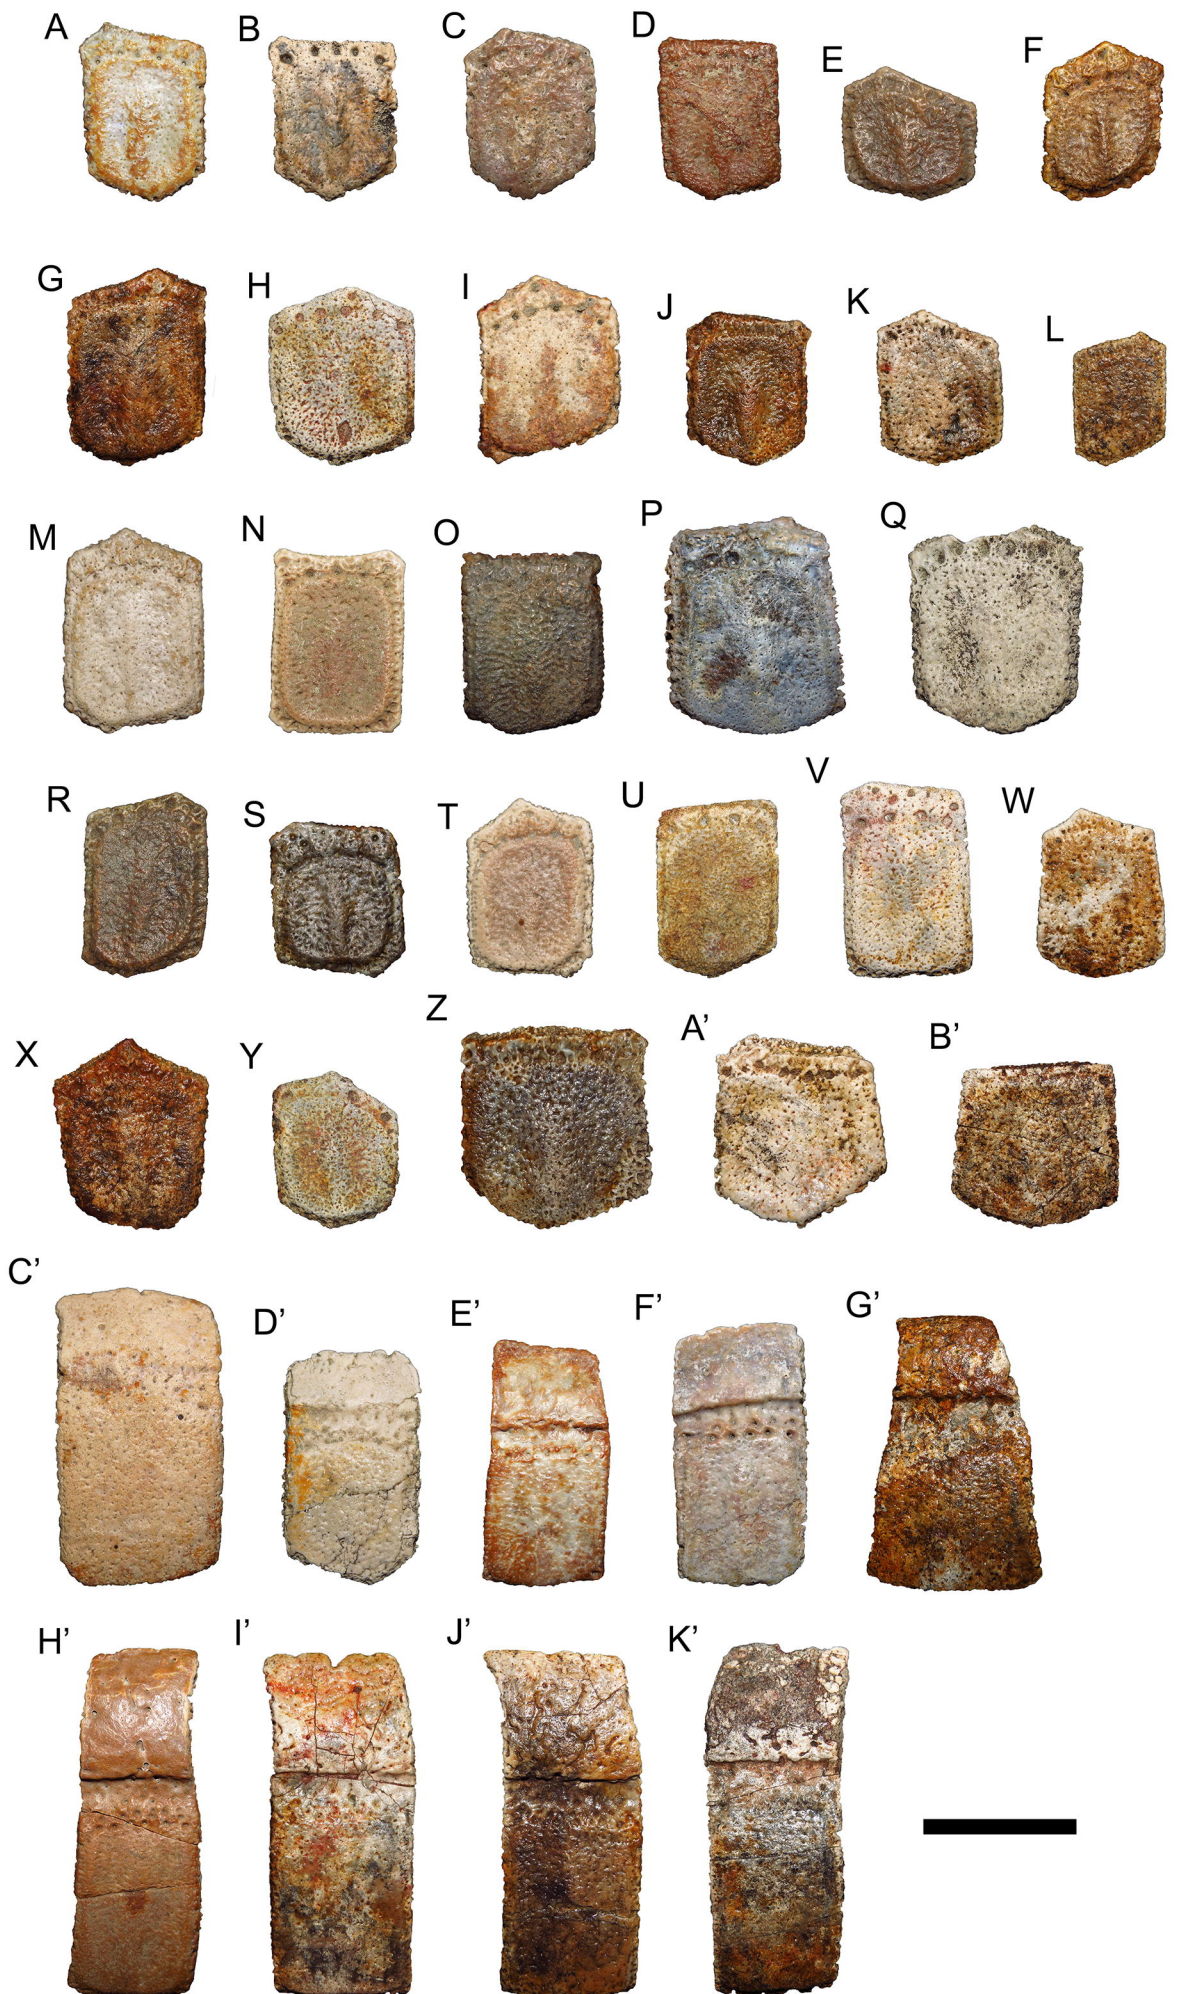

Figure 4

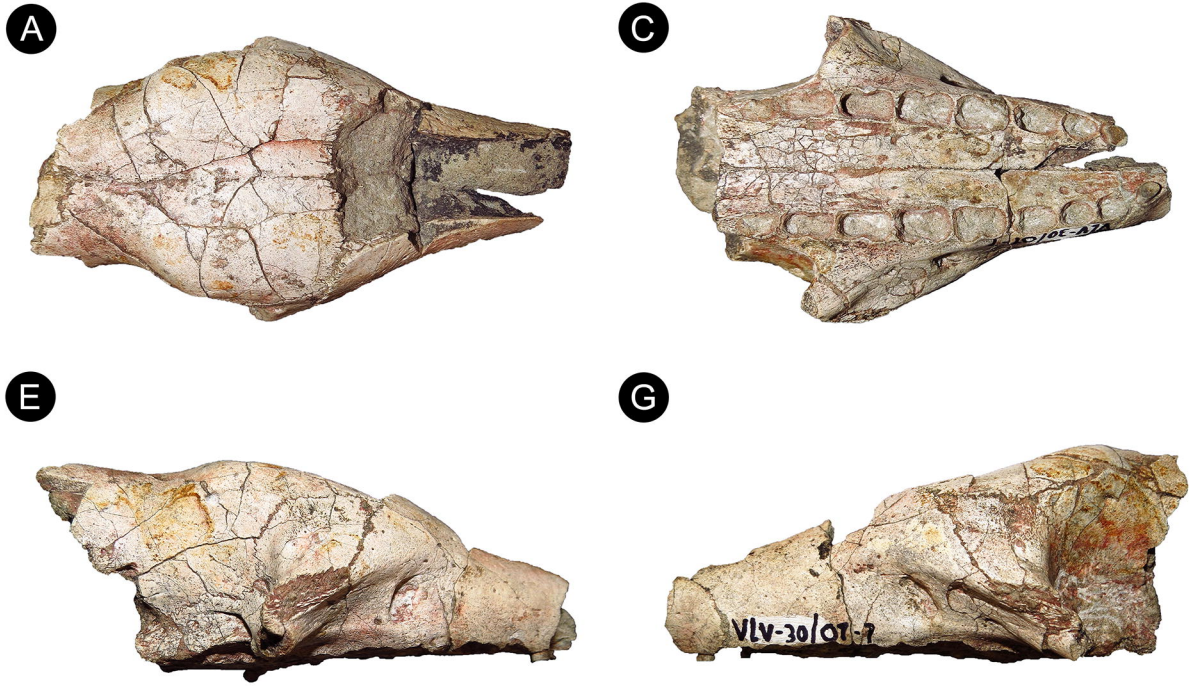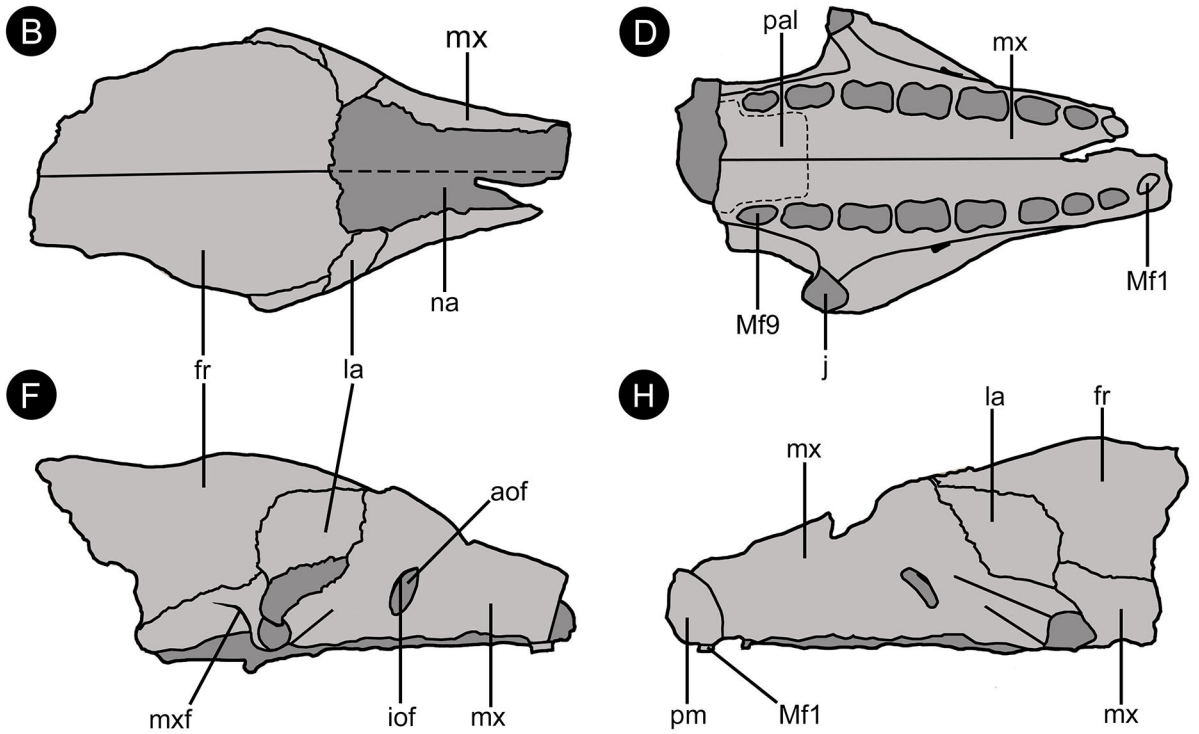

Figure 5

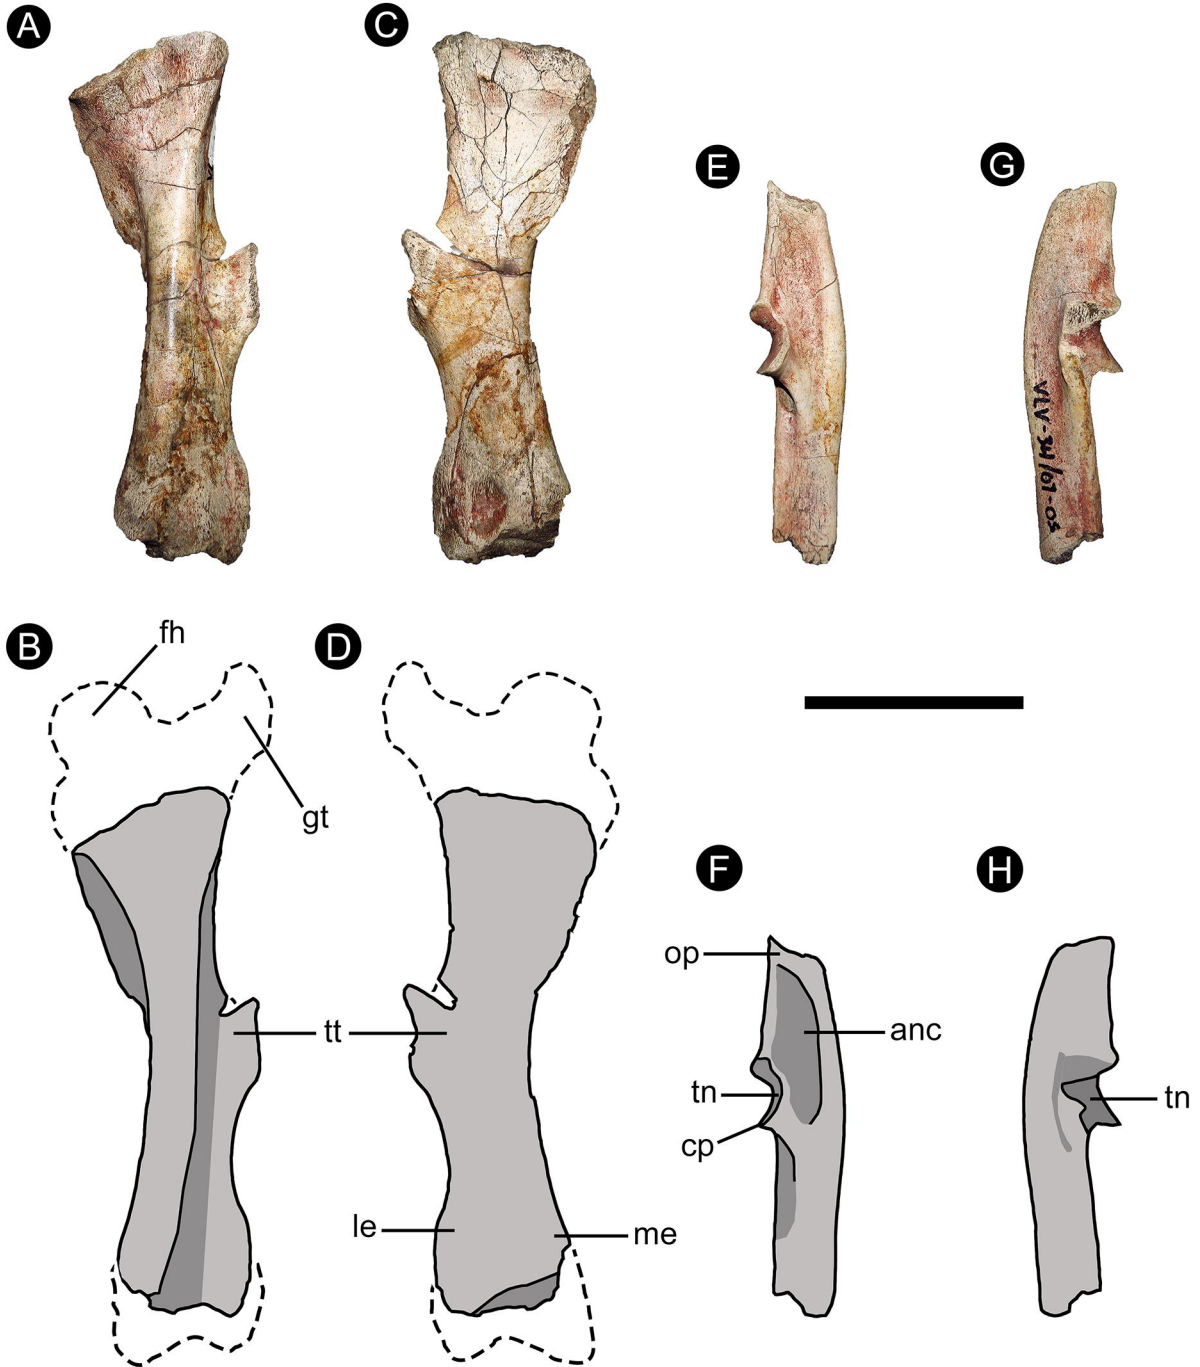

Figure 6

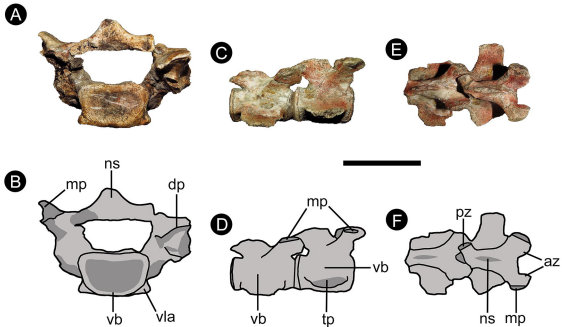

Figure 7

**A**

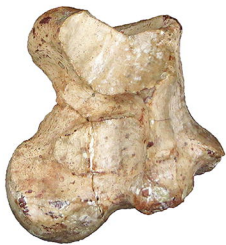

**C**

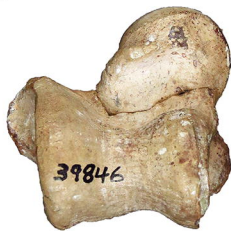

**E**

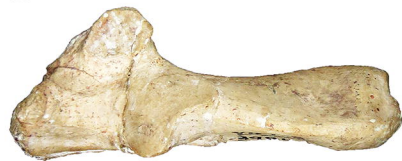

**B**

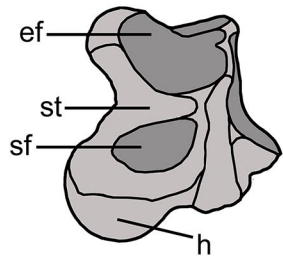

**D**

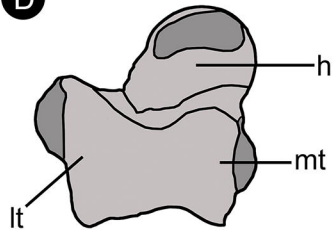

**F**

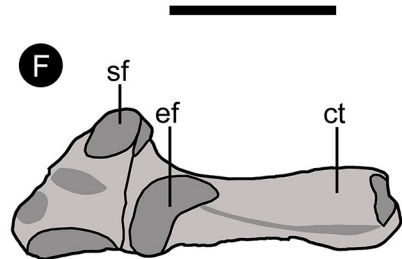



Figure 8

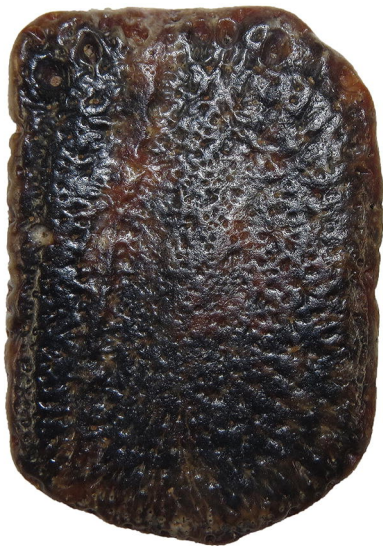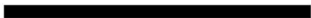

Figure 9

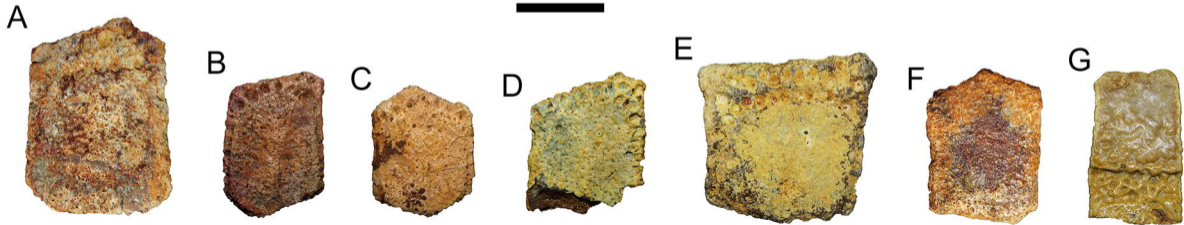

Figure 10

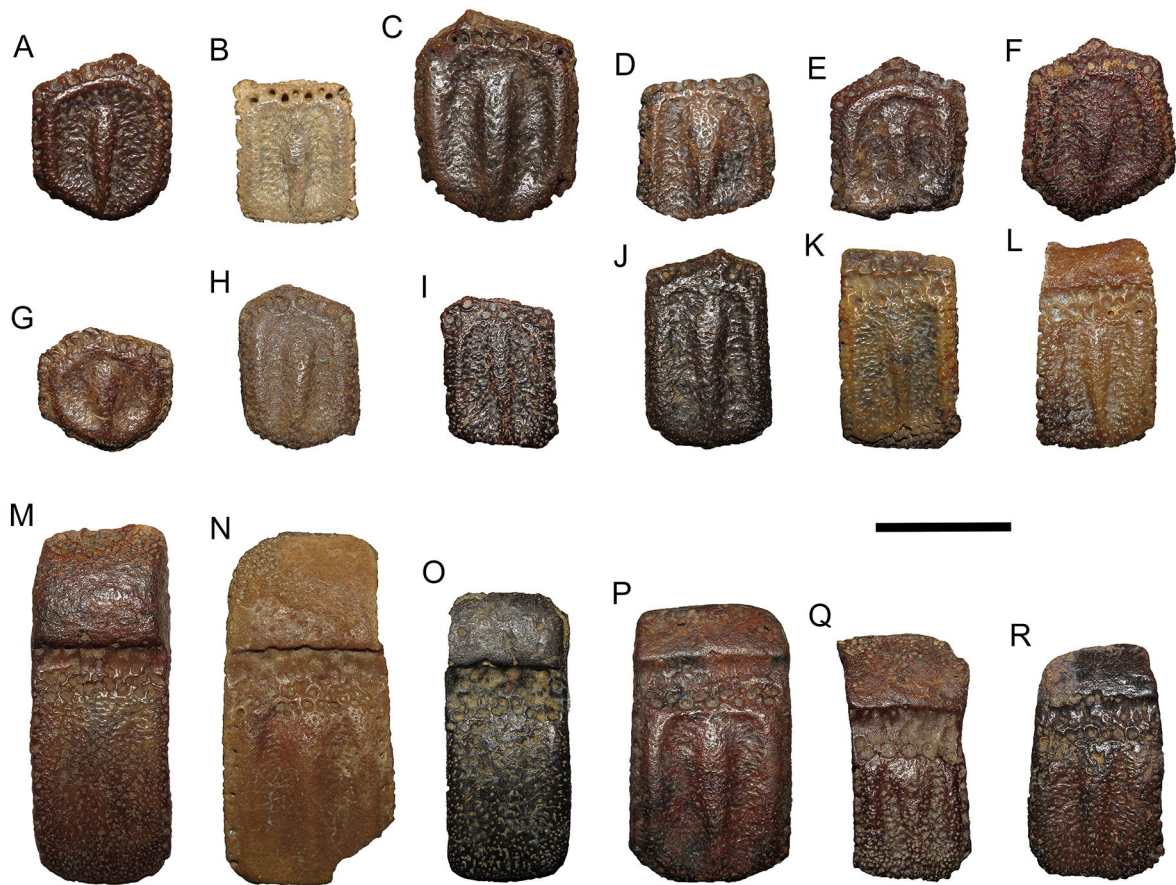

Figure 11

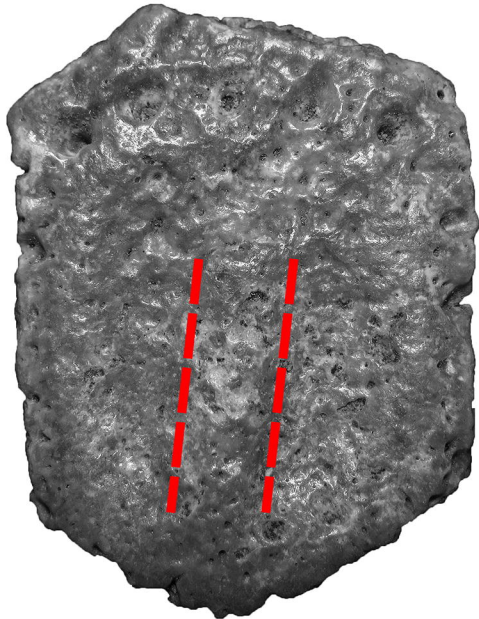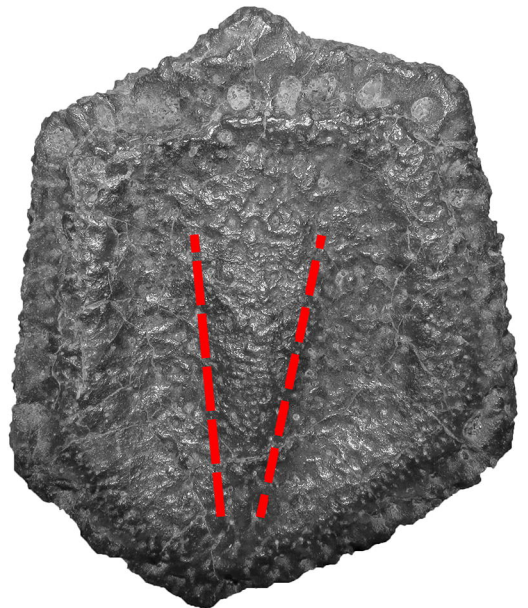

Figure 12

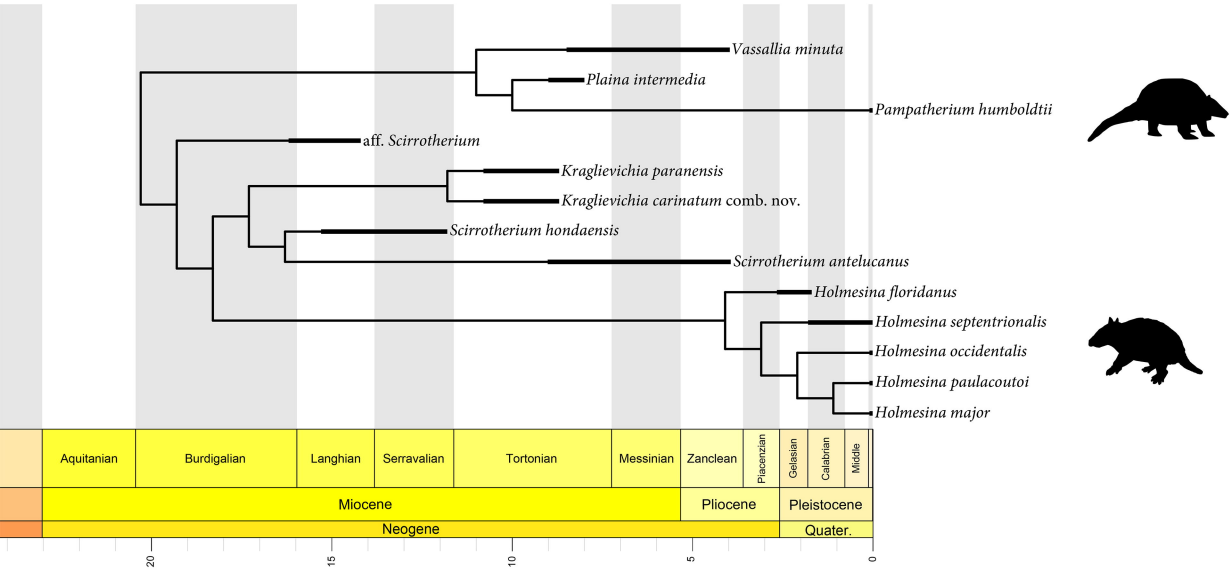

Figure 13

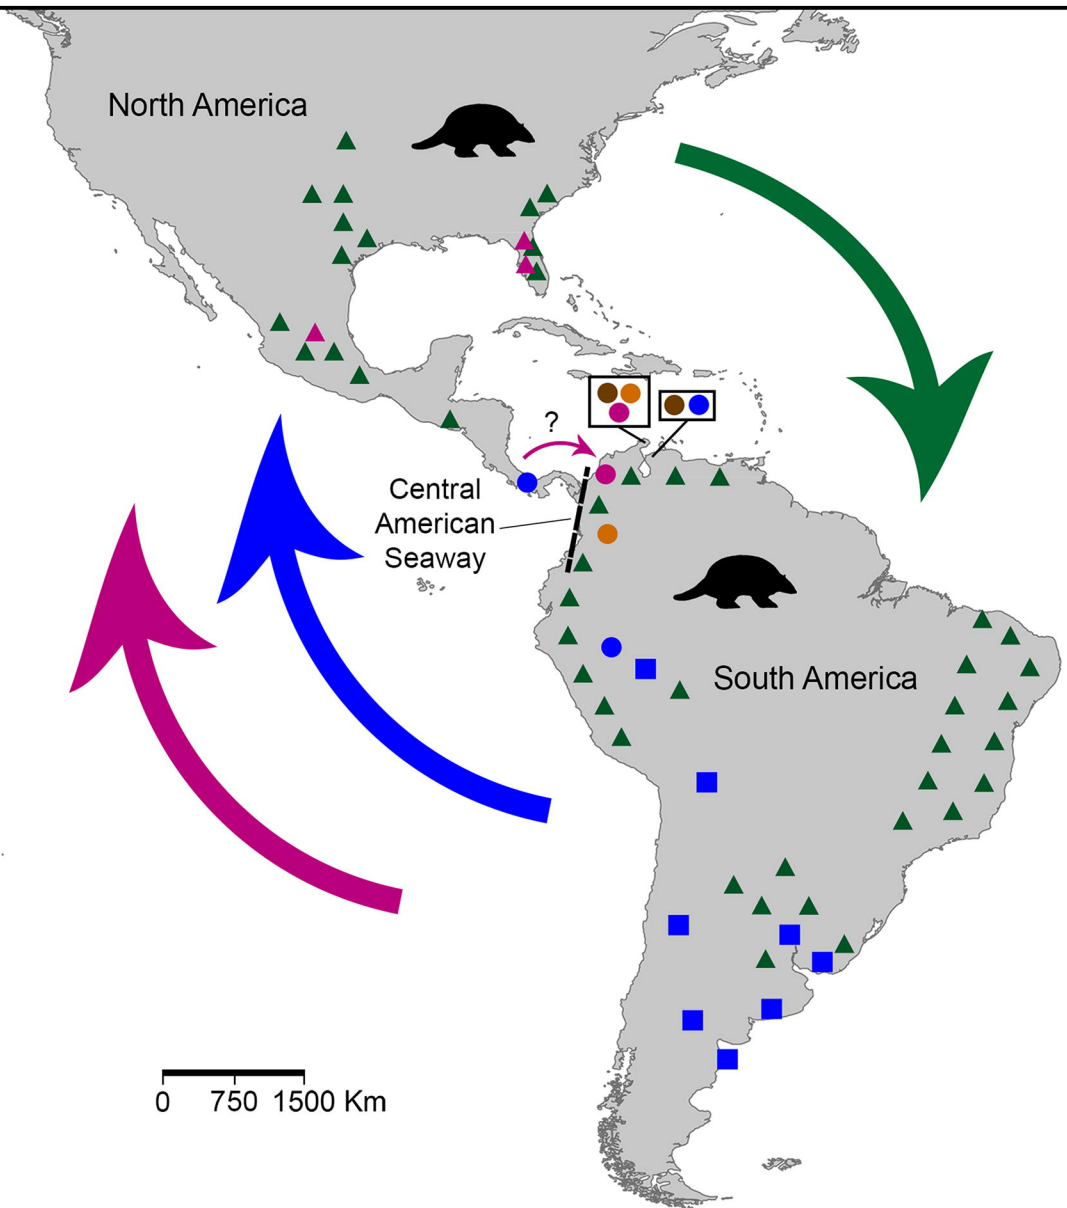

- Early Miocene - *Scirrotherium*
  - Middle Miocene - *Scirrotherium*
  - Late Miocene - *Scirrotherium*
  - Late Miocene - *Kraglievichia*
  - Pliocene - *Scirrotherium*
  - ▲ Pliocene - *Holmesina*
  - ▲ Pleistocene - *Holmesina*
- 
- ↪ Late Miocene dispersal event
  - ↪ Pliocene dispersal event
  - ↪ Pleistocene dispersal event
